1                   **Correlations of genotype with climate parameters suggest**  
2                   ***Caenorhabditis elegans* niche preferences**

3  
4                   Kathryn S. Evans<sup>\*,†</sup>, Yuehui Zhao<sup>‡</sup>, Shannon C. Brady<sup>\*,†</sup>, Lijiang Long<sup>‡</sup>,  
5                   Patrick T. McGrath<sup>‡</sup>, and Erik C. Andersen<sup>\*,§,††,1</sup>

6  
7                   \*Department of Molecular Biosciences, Northwestern University, Evanston, IL 60208,

8                   †Interdisciplinary Biological Sciences Graduate Program, Northwestern University,  
9                   Evanston, IL 60208

10                  ‡School of Biology, Georgia Institute of Technology, Atlanta, GA 30332

11                  §Chemistry of Life Processes Institute, Northwestern University, Evanston, IL 60208

12                  ††Northwestern Institute on Complex Systems, Northwestern University, Evanston, IL  
13                  60208

14                  <sup>1</sup>Corresponding Author

15  
16  
17  
18  
19  
20  
21  
22  
23  
24

25 **Running title: (35 characters):** Mapping climate variables to genotypes

26

27 **Keywords:**

28 *C. elegans*, weather, natural variation, niche, climate

29

30 **100-word summary for G3:**

31 Quantitative genetic approaches provide an opportunity to investigate correlations  
32 between genetic factors and environmental parameters that might define a niche, but  
33 these genes are difficult to identify, especially in the context of complex ecological  
34 systems. Here, we used a collection of 152 sequenced wild *Caenorhabditis elegans* to  
35 correlate climate parameters with the variation found in this collection of wild strains. We  
36 identified 10 QTL in five traits, including elevation, relative humidity, and temperature.  
37 Additionally, we performed competition assays to validate a QTL for temperature  
38 preference and found suggestive evidence that genotypes might be adapted to  
39 particular temperatures.

40

41 **Corresponding author:**

42 Erik C. Andersen  
43 Department of Molecular Biosciences  
44 Northwestern University  
45 3125 Cook Hall  
46 2205 Tech Drive  
47 Evanston, IL 60208  
48 847-467-4382  
49 erik.andersen@northwestern.edu

50  
51  
52  
53  
54  
55  
56  
57  
58  
59  
60  
61  
62  
63  
64  
65  
66  
67  
68  
69  
70

## ABSTRACT

Species inhabit a variety of environmental niches, and the adaptation to a particular niche is often controlled by genetic factors, including gene-by-environment interactions. The genes that vary in order to regulate the ability to colonize a niche are often difficult to identify, especially in the context of complex ecological systems and in experimentally uncontrolled natural environments. Quantitative genetic approaches provide an opportunity to investigate correlations between genetic factors and environmental parameters that might define a niche. Previously, we have shown how a collection of 208 whole-genome sequenced wild *Caenorhabditis elegans* can facilitate association mapping approaches. To correlate climate parameters with the variation found in this collection of wild strains, we used geographic data to exhaustively curate daily weather measurements in short-term (three month), middle-term (one year), and long-term (three year) durations surrounding the data of strain isolation. These climate parameters were then used as quantitative traits in the mapping approaches. We identified 10 QTL underlying variation in three traits: elevation, relative humidity, and average temperature. We then performed statistical analyses to further narrow the genomic interval of interest to identify gene candidates with variants potentially underlying phenotypic differences. Additionally, we performed two-strain competition assays at high and low temperatures to validate a QTL for temperature preference and found suggestive evidence that genotypes might be adapted to particular temperatures.

71

## INTRODUCTION

72

73

74

75

76

77

78

79

80

81

82

83

84

85

Ecological niches describe how individuals of a species respond to and alter the distribution of resources and competitors within their environment (Hutchinson 1957). These resources could include food availability, soil type, short-term weather conditions, and long-term climate. Often, a species can be found in multiple distinct geographic areas that all share a common set of environmental factors and resources. For example, a plant that thrives at high temperature might grow equally well anywhere along the equator. An organism's ability to survive in a specific niche is driven by both environmental and genetic factors. Genetic variation between species, and among individuals within a species, contributes to the wide variety of niches observed (Saltz and Nuzhdin 2014). A genetic variant could result in an increased affinity for an individual to its environment. This individual will be selected and, over time, evolution will favor the successful variant. This phenomenon, known as gene-by-environment interactions, refers to when different genotypes respond to environmental variation in diverse ways.

86

87

88

89

90

91

92

93

Previous studies in model organisms, particularly *Drosophila*, have investigated gene-by-environment interactions with clinal variation. Selection on body size is correlated with temperature (Taylor *et al.* 2015), and survival is affected by climate change (Bozinovic *et al.* 2016). Machado *et al.* performed a longitudinal study of *Drosophila* collected at differing latitudes during a two-year time span and compared physiological traits of two different species – *D. melanogaster* and *D. simulans* (Machado *et al.* 2016). Other studies have gone further by identifying quantitative trait loci (QTL) for body size and cold tolerance traits involved in adaptation to seasonally

94 varying environments (Tyukmaeva *et al.* 2015; Hangartner *et al.* 2015). Gerken *et al.*  
95 found substantial heritable variation in both short-term and long-term acclimation  
96 (Gerken *et al.* 2015). They then performed genome-wide association mappings on  
97 these traits and found the QTL for short-term and long-term adaptations did not overlap,  
98 but each resulted in a set of gene candidates sharing similar functions of apoptosis,  
99 autophagy, cytoskeletal and membrane structural components, and ion binding and  
100 transport. Missing from these studies is genome-wide association mappings for other  
101 environmental traits besides temperature and latitude. Furthermore, little has been  
102 studied for other model organisms, such as *Caenorhabditis elegans*.

103 *C. elegans* is a free-living nematode often found in microorganism-rich organic  
104 material such as rotting fruits and compost heaps in temperate and humid environments  
105 (Frézal and Félix 2015; Félix and Braendle 2010). The first studied *C. elegans* strain,  
106 N2, was isolated from mushroom farm compost in Bristol, England in 1951 (Hodgkin  
107 and Doniach 1997). Since that time, N2 has been used as the wild-type strain for *C.*  
108 *elegans* laboratory research. This strain was cultured for many years in the laboratory,  
109 potentially resulting in selection for alleles favorable in that environment (Sterken *et al.*  
110 2015). To study natural variation and the role of niche specification on this species, we  
111 require a worldwide collection of wild strains. Our research group acquired a large  
112 collection of 208 wild strains and sequenced the whole genomes of these strains (Cook  
113 *et al.* 2016). By comparing the genomes of the 208 strains, we found that some strains  
114 from similar geographic locations have nearly identical genome sequences. This  
115 analysis results in 152 unique genome-wide haplotypes or isotypes. This large pool of  
116 genetic information provides us with the statistical power to make connections between

117 genotype and phenotype using genome-wide association (GWA) studies. GWA studies  
118 use common genetic variation across a population of individuals to discover variants  
119 that are correlated with a specific trait of interest (Hirschhorn and Daly 2005).

120 In this study, we correlate natural genetic variation among 152 wild *C. elegans*  
121 strains with climate measurements of their environmental niches as quantitative traits.  
122 We mapped traits that describe the niche of the isolation location for each strain,  
123 including geographic parameters, seasonal weather patterns, and climate variables. We  
124 find significant associations for elevation, relative humidity, and temperature. These  
125 findings suggest genetic control of niche specification. Additionally, we tested the  
126 quantitative trait locus (QTL) associated with temperature and found possible evidence  
127 of a specific preference for lower temperatures based on genetic background.

128

## 129 RESULTS

### 130 **Genome-wide association of geographic traits**

131 The location where a *C. elegans* strain was identified could reflect the process of  
132 selection for a particular genotype in a specific niche. For this reason, we investigated  
133 correlations between genetic variation in the *C. elegans* population and parameters  
134 describing the geographic locations of isolation as quantitative traits. Previous work with  
135 a smaller set of strains (97 wild isolates) detected a significant QTL on the left arm of  
136 chromosome II associated with the latitude where strains were isolated (Andersen *et al.*  
137 2012). To evaluate this trait and other parameters describing the location where each  
138 strain was isolated in our larger strain set (152 strains), we curated the isolation location  
139 information and defined several traits based on geographic data for each strain (Table

140 1), namely latitude, longitude, elevation, the absolute value of latitude, and the absolute  
141 value of longitude (File S1). We performed genome-wide association mappings with 149  
142 wild strains with known isolation locations (Figure 1A) to correlate these trait values with  
143 common genetic variation (File S2; see *Methods*). Using this strain set, only the  
144 mapping of the elevation of the isolation location identified a significant QTL on the left  
145 arm of chromosome III (Figure 2A). When we divided the population by the genotype at  
146 the peak marker, we found that the elevation values for these two sets of strains were  
147 similar with a few outliers (Figure 2B), suggesting that the outliers were causing the  
148 detection of a QTL. It is possible that the association is spurious and driven by outliers  
149 or that the outliers are strains harboring rare alleles in the *C. elegans* species that  
150 impact this trait. The outlier strains in our mapping could share some genetic similarities  
151 as they were all collected within the last 15 years, and most were collected in France or  
152 elsewhere in Northern Europe. We did not recapitulate the QTL for latitude observed in  
153 the previous study (Andersen *et al.* 2012) likely because it also appears to be driven by  
154 strains with extreme latitude values. Again, these outlier strains could be highly related  
155 as seven of the 15 strains with the alternate genotype at the peak marker position  
156 originated from South Africa or Kenya. Our larger strain set reduces the effect of these  
157 outliers on the GWA mapping, and the previously detected QTL is no longer significant.  
158 These results suggest that common variation in the *C. elegans* species does not  
159 correlate with geographic parameters describing the location of strain isolation.  
160 However, rare variants might control whether strains can colonize and/or proliferate in  
161 specific geographic locations.

162

163 **Weather conditions and climate parameters can be determined using the**  
164 **geographic location of the site of strain isolation**

165 It is likely that the possible genetic association we observed between the  
166 elevation of strain isolation and a region on chromosome III is correlated with weather  
167 patterns and/or climate variables at specific geographic locations. Strain latitude and  
168 longitude can be used to determine the weather or climate at the time and location from  
169 which each wild *C. elegans* strain was isolated. The short-term weather surrounding the  
170 day of isolation as well as the long-term climate of the geographic location for each  
171 strain could improve our understanding of possible preferred niches for specific strains  
172 or for the species as a whole. Furthermore, combining these climate parameters with  
173 whole-genome sequence data could identify potential alleles that underlie preferences  
174 for certain environmental factors.

175 The National Oceanic and Atmospheric Administration (NOAA) collects and  
176 provides multiple datasets related to weather and climate information, including the  
177 Integrated Surfaces Data (ISD). The ISD dataset is archived at the National Climatic  
178 Data Center (NCDC) and is composed of worldwide surface weather observations from  
179 over 27,000 stations managed by different global institutions (“Integrated Surface Global  
180 Hourly Data - NOAA Data Catalog” 2016). First, we manually curated the isolation  
181 information for the 152 strains, including the date of isolation, location, and sampling  
182 information (File S1). Then, we overlaid the locations of the 27,447 ISD weather stations  
183 with the isolation locations of the 149 *C. elegans* wild strains with complete sampling  
184 data (Figure 1A). Using the date and isolation location for each wild strain, we identified  
185 the closest weather station with available data and collected weather observations in



186 three time periods surrounding the date of nematode isolation: three months, one year,  
187 and three years. Most strains were found less than 60 km from a weather station  
188 (Figure 1B). Of the 149 strains with known isolation locations, we knew at least the year  
189 of isolation for 145 strains, the month for 138 strains, and the day for 122 strains. For  
190 the three-month period, we analyzed weather station data only for strains with known  
191 days of isolation to provide a precise account of the daily weather experienced  
192 immediately surrounding the date of isolation for each strain. However, for the one-year  
193 period we used data from strains with known day or month of isolation. For the three-  
194 year period, we used data from strains where either the day, month, or year of isolation  
195 is known to provide an estimated overall climate of the strain isolation location. Not  
196 every weather station sampled contained data for each weather parameter. Additionally,  
197 only quantitative weather parameters that were measured at locations shared in a  
198 majority of the wild-isolate population (more than 90% of the strains) were considered  
199 for further analysis (Table 1). All observations for each weather parameter were  
200 averaged over the given time period, and this average value was used as the trait  
201 measurement for each strain (File S2, *see Methods*).

202 We evaluated all weather observations over the three months, one year, or three  
203 years surrounding the date of nematode isolation for each of the 149 wild strains to  
204 define the weather or climate experienced by each strain. These data were mapped  
205 using GWA to define nine QTL (Figure S1) for two distinct traits – relative humidity and  
206 temperature.

207

208 **Genome-wide association of average relative humidity**

209 *C. elegans* is found at various relative humidities ranging from 36% to 92%, with  
210 an average of 71.8% (File S2). This estimate of the average relative humidity of the *C.*  
211 *elegans* niche is in concordance with previous studies that show *C. elegans* is often  
212 found in humid environments (Frézal and Félix 2015). To determine if variation in  
213 relative humidity at isolation location is correlated with genetic variation, we performed  
214 GWA mapping for relative humidity of isolation location for three months, one year, and  
215 three years surrounding the date of isolation (see *Methods*). We found eight significant  
216 QTL in three distinct regions of the *C. elegans* genome: the left arm of chromosome II,  
217 the right arm of chromosome III, and the right arm of chromosome V (Figure 3, File S2).  
218 The mapping for average relative humidity over three months surrounding the date of  
219 isolation (Figure 3A) resulted in two linked QTL on the left arm of chromosome II ( $LD\ r^2$   
220 = 0.999, Figure S1) and a QTL on the right arm of chromosome III that is also in high  
221 linkage disequilibrium with the QTL on chromosome II ( $LD\ r^2 = 0.634, 0.812$ ; Figure S1).  
222 The mapping for average relative humidity over one year surrounding the date of  
223 isolation (Figure 3B) resulted in one QTL on the left arm of chromosome II and two  
224 highly linked QTL on the right of chromosome V ( $LD\ r^2 = 0.536$ ; Figure S1). The position  
225 of the chromosome II QTL is the same as that observed for the mapping of three-month  
226 humidity. Finally, the mapping of average relative humidity over the three years  
227 surrounding the date of isolation (Figure 3C) resulted in the same two QTL on  
228 chromosome V as found for the mapping of one-year relative humidity (Figure S1). For  
229 each QTL, strains with the reference allele at the peak marker tend to be isolated at  
230 higher relative humidities, and strains with an alternative allele tend to be isolated at  
231 lower relative humidities (Figure S1). This evidence of a phenotypic split dependent on

232 genotype of the peak marker suggests that at least one variant could underlie a  
233 preference for relative humidity.

234

### 235 **Genome-wide association of average temperature**

236 *C. elegans* are also found at a variety of average temperatures ranging from 7°C  
237 to 25°C, with an average of 15.3°C (File S1). To determine if temperature is associated  
238 with genetic variation, we performed a GWA mapping for temperature of isolation  
239 location for three months, one year, and three years surrounding the date of isolation  
240 (see *Methods*). We found one significant QTL just right of the center of chromosome V  
241 (Figure 4A; File S2). This QTL is in the same location as that observed for one-year and  
242 three-year relative humidity (Figure 3B, 3C). We found that strains with the reference  
243 (N2) allele at the peak marker tend to be isolated from geographic locations with lower  
244 temperatures, and strains with an alternative allele at this position tend to be isolated  
245 from geographic locations with higher temperatures (Figure 4B). This QTL suggests that  
246 an allele, or alleles nearby this marker, could confer survival advantages to strains that  
247 experience different temperatures. To identify the variant(s) that could be driving this  
248 QTL, we investigated a region on chromosome V (V:13,845,281-15,332,878) defined by  
249 1.48 Mb that contains 619 total genes. The genes with predicted functional variants are  
250 most likely to cause phenotypic differences among diverse strains in species. Therefore,  
251 we focused on 363 genes within this region predicted to harbor functional variants of  
252 moderate or severe effects on gene function, as determined by SnpEff (Cingolani *et al.*  
253 2012). We can further narrow our list of candidate genes to 48 by identifying genes that  
254 are highly correlated with differences in temperature (File S3). Although an investigation

255 of these 48 genes did not identify an obvious candidate related to temperature  
256 regulation, one or more of these genes could be responsible for the preference of  
257 certain strains for specific temperatures.

258

### 259 **Strains from divergent climates might be adapted to specific temperatures**

260 Although we have GWA mappings for various weather conditions, validating  
261 these QTL would provide more evidence for *C. elegans* selection of niche based on  
262 environmental and geographic factors. Because temperature can be controlled easily  
263 and survival at defined temperatures can be tested experimentally, we decided to  
264 determine whether two strains from divergent climates are adapted to the respective  
265 temperatures nearby their isolation locations using a competition assay. Strains were  
266 chosen that had both a different genotype at the peak marker of the QTL on  
267 chromosome V identified in the three-year temperature mapping experiment and a large  
268 difference in the temperatures nearby the isolation location. JU847, a strain isolated  
269 from Northern France in 2005 (File S1), has the reference genotype at the three-year  
270 temperature QTL peak marker and is found at a low three-year average temperature  
271 (11.3°C). CX11314, a strain isolated from Southern California, USA in 2003 (File S1),  
272 has the alternative genotype at the three-year temperature QTL peak marker and is  
273 found at a higher three-year average temperature (20.9°C). High fitness at or around  
274 the temperature nearby the isolation location of one strain and lower fitness at or around  
275 the temperature nearby the isolation location for the other strain would suggest potential  
276 adaptive alleles that contribute to a preference and/or better survival at a specific  
277 temperature.

278 Replicate cultures were initiated with an equal number of animals from each  
279 strain at either 15°C or 25°C and allowed to compete for at least six generations. After  
280 culture transfers two, four, and six, we analyzed the ratios of the two strains found at  
281 each temperature (see *Methods*). CX11314 was found to have higher fitness than  
282 JU847 at both temperatures tested (Figure 5). At high temperature, CX11314 had a  
283 clear selective advantage compared to JU847 (for fitness = 1, relative CX11314 fitness  
284  $s = 2.29$ ), resulting in JU847 alleles comprising less than 1% of the alleles measured  
285 after six culture transfers. However, JU847 performed better at the lower temperature  
286 than at the higher temperature, comprising almost 8% of the total nematode population  
287 after six culture transfers (relative CX11314 fitness  $s = 1.57$ ). These data suggest that  
288 JU847, although not more fit than CX11314 at either temperature, is more fit at 15°C  
289 than at 25°C.

290

291

## DISCUSSION

292 In this study, we have defined geographic, weather, and climate variables over  
293 three different time periods as phenotypic traits for 149 unique wild *C. elegans* strains  
294 and performed genome-wide association mapping for 11 traits. Each phenotype  
295 described in this study was obtained using the location, date, and weather of the known  
296 isolation location of each isotype in our collection. We found significant correlations  
297 between genotype and phenotype for three traits and a total of 10 QTL. However, only  
298 temperature displayed strong phenotypic separation associated with genotypic variation  
299 that was likely not driven by outlier strains.

300           Although we found a significant QTL associated with the elevation of isolation  
301 location, we did not recapitulate the QTL for latitude observed in the previous study  
302 (Andersen *et al.* 2012). This difference is likely because the previous mapping appears  
303 to be driven by strains with extreme latitude values, similar to our elevation mapping.  
304 The larger strain set in this analysis reduces the effect of these outliers on the GWA  
305 mapping, and thus the QTL is no longer significant. However, we did observe a QTL  
306 associated with latitude just below the Bonferroni-corrected significance threshold on  
307 the right arm of chromosome V. This suggestive QTL is in close proximity to the QTL for  
308 temperature. It is possible that the moderate association seen with latitude is  
309 representative of a real association with temperature, as the two traits are highly  
310 correlated. In our dataset, we see a high negative correlation between the absolute  
311 value of latitude and temperature ( $\rho = -0.805$ ), and between latitude and temperature  
312 ( $\rho = -0.772$ ). This lower-than-expected correlation is likely due to temperature  
313 fluctuations throughout the year: temperature at high latitude in the summer would be  
314 similar to temperature near the equator in the winter. Additionally, the latitude and  
315 longitude recorded for a particular strain is not always precise, especially for strains with  
316 older isolation dates. One tenth of a degree of latitude can distinguish between large  
317 cities, but could cover up to 11.1 km of distance. The function we used to determine  
318 elevation of strain isolation used these imprecise latitude and longitude coordinates,  
319 potentially resulting in a range of small to sizeable errors. These estimations could  
320 affect not just the geographic traits, but the weather traits as well, which are calculated  
321 based on the geographic coordinates. However, we do not expect this estimation to

322 have a large effect, as we found weather data between stations up to 150 km apart to  
323 be highly correlated (see *Methods*).

324 We chose to assess weather conditions for each of the 149 strains over three  
325 time periods: three months, one year, and three years. A duration of three months was  
326 chosen to define the weather contemporary to the date of isolation. One year was  
327 chosen to evaluate the average weather patterns a strain must be able to survive in  
328 nature. Three years was chosen to define the climate of the isolation location. Using  
329 data from three years could help us understand the average long-term climate  
330 conditions for each strain by eliminating any unusual weather patterns during the year of  
331 isolation that are not representative of the overall average environmental conditions.  
332 The relative humidity trait maps to the same chromosome positions for all three time  
333 periods assayed, suggesting that relative humidity remains constant throughout  
334 seasons. Previous studies have also shown that *C. elegans* tend to be found in humid  
335 regions (Frézal and Félix 2015). The same QTL on the right arm of chromosome V was  
336 observed for both long-term relative humidity and long-term temperature. Because  
337 relative humidity depends on air temperature, these results are expected to be  
338 correlated. Although the average temperature maps with only the three-year data set,  
339 we observed a QTL at the same position just below the significance threshold for the  
340 one-year mapping dataset as well. This suggestive QTL provides more evidence that  
341 one or more variants on chromosome V are associated with differences in long-term  
342 average temperature of isolation for *C. elegans*.

343 The QTL for temperature was evaluated further because it could be controlled in  
344 a laboratory setting. The competition assay between JU847 and CX11314 showed that

345 CX11314 had a higher selective advantage than JU847 at both high and low  
346 temperatures. This result could be observed because the laboratory environment can  
347 not completely recapitulate conditions experienced in the wild. Additionally, it is possible  
348 that CX11314 is more fit than JU847 regardless of temperature. To test this QTL more  
349 thoroughly and eliminate this possibility, it would be necessary to compete multiple high  
350 and low temperature strains. We found that the low temperature strain, JU847, was  
351 more competitive with the high temperature strain, CX11314, at the lower temperature.  
352 This result provides evidence that one or more genetic variants within the QTL could  
353 underlie the hypothesized temperature preference. Furthermore, the duration of this  
354 experiment was only six weeks. At the lower temperature, it is possible we could  
355 observe a stronger competitive advantage for JU847 over a longer time period.

356         Although our analyses were unable to identify a single gene or variant that could  
357 underlie potential differences in niche specification, our conclusions suggest that  
358 different strains are found in unique niches and at least some of the environmental  
359 differences in niches are related to genetic variation among strains. As we expand our  
360 collection of wild *C. elegans* strains, we will be able to better define these weather and  
361 climate differences. Additionally, longitudinal collection studies with dense sampling,  
362 especially in a location with known high species diversity (such as the Hawaiian Islands)  
363 would give us more valuable data about how genetic variation in *C. elegans* is related to  
364 environmental conditions. We expect that similar data could be analyzed for other  
365 species and allow for investigation of niche specification, specifically in plant species  
366 where dense sampling and whole-genome datasets are available.

367



368

## MATERIALS AND METHODS

### 369 ***C. elegans* wild isolate collection and sequencing**

370 A collection of 208 wild *C. elegans* strains have been isolated worldwide and  
371 annotated for each strain's geographic location and date of isolation. Members of the  
372 Andersen Lab have carefully and manually curated this dataset to offer the most  
373 accurate information possible while accounting for sometimes imprecise sample  
374 recording. Whole-genome sequence (WGS) data were collected from all 208 strains  
375 (Cook *et al.* 2016). The raw Illumina data are deposited with the Short Read Archive  
376 under project PRJNA318647. WGS data were analyzed as previously described. In  
377 brief, after alignment with BWA (Li and Durbin 2009) and variant calling using Samtools  
378 (Li *et al.* 2009), strains with a concordance of 99.93% or higher were grouped as a  
379 genome-wide haplotype or isotype. This analysis resulted in 152 unique isotypes (File  
380 S1).

381

### 382 **Weather and climate data acquisition**

383 For each wild strain with a known isolation location, elevation was estimated with  
384 the “geosphere” package in R (Hijmans, Williams, and Vennes 2012) using the  
385 geographic coordinates of strain isolation. A correlation test using 74 points of known  
386 elevation were used to verify accuracy of the elevation function resulting in a correlation  
387 of 0.998. Weather data were downloaded from the Integrated Surface Data (ISD) FTP  
388 server (<ftp://ftp.ncdc.noaa.gov/pub/data/noaa/>) managed by the National Oceanic and  
389 Atmospheric Administration (NOAA) and the National Climatic Data Center (NCDC).  
390 The ISD dataset comprises worldwide surface weather observations from over 27,447

391 stations managed by the Automated Weather Network (AWN), the Global  
392 Telecommunications System (GTS), the Automated Surface Observing System  
393 (ASOS), and others. Data are collected once every three hours for some stations. Some  
394 parameters include air quality, atmospheric pressure, atmospheric temperature, dew  
395 point, atmospheric winds, clouds, precipitation, ocean waves, and tides.

396 Three distinct sets of weather station data were collected for analysis: a three-  
397 month window, a one-year window, and a three-year window. These data were filtered  
398 to include values centered around the date of isolation. For the three-month set, wild  
399 isolates with only a known month or year of isolation were not considered. Exact day of  
400 isolation is necessary to understand the seasonal environment in which an animal was  
401 isolated. For the one-year dataset, wild isolates with a month or day of isolation were  
402 used. For the three-year dataset, strains with only a year of isolation were used in  
403 addition to those strains with more defined dates of isolation. If only the year was  
404 known, the date of isolation defaulted to January 1 of that year, and data were collected  
405 surrounding that date. If only the month of isolation was known, the date of isolation was  
406 defaulted to the first of that month for data collection.

407 The 27,447 NOAA weather stations were filtered by their availability of data  
408 collected within the years of interest. Stations that had less than ten recordings of any  
409 type for any month within the time period of data collection were excluded to avoid  
410 misrepresentation by datasets that were averaged from only a few data points. Stations  
411 were then filtered by location, and the closest station to location of isolation for each  
412 wild strain was selected and downloaded using the “stationaRy” package available at  
413 <https://github.com/rich-iannone/stationaRy> (Iannone 2015). We performed a rank-

414 correlation test for temperature, relative humidity, and atmospheric pressure between  
415 two neighboring weather stations (ranging from 0.93-153 km apart) and found high  
416 correlations regardless of distance between stations ( $\rho = 0.920, 0.913, \text{ and } 0.707,$   
417 respectively). All station-isotype pairs were included in our analysis regardless of the  
418 distance between them. The primary fields as well as all additional quantitative data  
419 available for each station were downloaded. Some fields (e.g. “AT1” or “Present-  
420 weather-observation”) were not downloaded from the NOAA database because the  
421 traits are qualitative and would not be conducive to quantitative analyses. The station  
422 data were filtered to contain only information from the months surrounding the date of  
423 isolation. This process was repeated for each dataset (three-month, one-year, and  
424 three-year) in case a closer weather station contained only data for the three-month set  
425 but not for the one-year or three-year sets. The station data were meticulously checked  
426 by manually removing missing values from each weather category independently and,  
427 in certain cases, converting fields to uniform units that can be averaged to form a trait  
428 value. For example, precipitation (“AA1”) was downloaded in two columns: 1) time  
429 period; 2) depth of precipitation recorded during that time period. Because the variable  
430 time periods in which data were recorded, averaging precipitation would lead to skewed  
431 results. Precipitation was changed to adapt a “precipitation per hour” model that would  
432 be more permissive to our analyses. Each trait was averaged over the time span  
433 collected (three months, one year, or three years), and the average value was  
434 designated as the phenotypic value for that strain. Only traits with values in more than  
435 90% of strains were analyzed further.  
436

## 437 **Association mapping**

438 Genome-wide association (GWA) mapping was performed using 152 genome-  
439 wide *C. elegans* isotypes using the cegwas R package found at  
440 <https://github.com/AndersenLab/cegwas>. This package uses the EMMA algorithm for  
441 performing association mapping and correcting for population structure (Kang *et al.*  
442 2008), which is implemented by the GWAS function in the rrBLUP package (Endelman  
443 2011). The kinship matrix used for association mapping was generated using a whole-  
444 genome high-quality single nucleotide variant (SNV) set (Cook *et al.* 2016) and the  
445 A.mat function from the rrBLUP package. Single-nucleotide variants identified using  
446 RAD-marker sequencing (Andersen *et al.* 2012) that had at least 5% minor allele  
447 frequency in the 152 isotype set were used for performing GWA mappings. Association  
448 mappings that contained at least one SNV that had a  $-\log(p\text{-value})$  greater than the  
449 Bonferroni-corrected  $p$ -value were processed further using fine mapping, which entails a  
450 Spearman's rank correlation test with variants from the whole-genome sequence data of  
451 moderate to severe predicted effects as determined by the SnpEff function (Cingolani *et*  
452 *al.* 2012).

453

## 454 **Temperature competition assays**

455 We chose two strains, CX11314 and JU847, that had different alleles for the  
456 peak QTL marker (chrV: 14,822,276; JU847: T, CX11314: A) in our three-year  
457 temperature GWA mapping. JU847 has the reference allele for the peak marker and  
458 was isolated at a low temperature, whereas CX11314 has the alternative allele for the  
459 peak marker and was isolated at a higher temperature. We designed a Taqman probe

460 (5'-[A]CCGTTTTTTTTT[T/A]AATTTT-3') to measure each of these two alleles from mixed  
461 samples of nematodes using the standard software from Applied Biosystems  
462 (<https://www.thermofisher.com/order/custom-genomic-products/tools/genotyping/>) and a  
463 corresponding primer set to amplify the region of interest (below).

464

465 F: 5'-AAACCCAAGATTTTTATGGTACTTTAAGATTTGT-3';

466 R: 5'-ATCTATAGTAACTTGGATATATTGTTTGTTCGGT-3'

467

468 These two strains were chunked to fresh 10 cm NGMA plates seeded with OP50. 48  
469 hours later, seven L4s from each strain were added to each of 45 6 cm NGMA plates  
470 seeded with OP50 for both 15°C and 25°C competition experiments. The 45 plates at  
471 each temperature represent nine experimental replicates each composed of five  
472 independent populations. Plates were placed at either 15°C or 25°C and grown to  
473 starvation. After one week for 25°C competition experiments or 10 days for 15°C  
474 competition experiments, nematodes were transferred to fresh NGMA plates by cutting  
475 a 0.5 cm x 0.5 cm square of agar (containing ~100 worms) and replaced at the  
476 appropriate temperature. After culture transfers two, four, and six, starved animals were  
477 washed off the plates with M9, and DNA was collected using the Qiagen DNeasy Kit.  
478 Genomic DNA from each time point was digested with the *EcoRI* enzyme and purified  
479 using the Zymo DNA Clean & Concentrator Kit. The concentration of fragmented  
480 genomic DNA was adjusted to 2 ng/μL by Qubit assay. The number of JU847 and  
481 CX11314 alleles in each replicate population was measured using Taqman analysis in a  
482 Biorad QZ200 digital droplet PCR system (File S4). Digital PCR was performed

483 following the standard protocol provided by Biorad with the absolute quantification  
484 method. The proportion of the JU847 allele and the relative selection coefficients were  
485 calculated.

486

#### 487 **Data Availability**

488 Strains are available through the *Caenorhabditis elegans* Natural Diversity Resource  
489 (CeNDR, [www.elegansvariation.org](http://www.elegansvariation.org)). File S1 contains the strains, location data,  
490 weather station data, and all traits used in mappings. File S2 contains the association  
491 mapping data. File S3 contains the interval fine mapping raw data. File S4 contains the  
492 count data from the digital droplet PCR for JU847 and CX11314 alleles.

493

## LITERATURE CITED

- 494 Andersen, Erik C., Justin P. Gerke, Joshua A. Shapiro, Jonathan R. Crissman, Rajarshi  
495 Ghosh, Joshua S. Bloom, Marie-Anne Félix, and Leonid Kruglyak. 2012.  
496 “Chromosome-Scale Selective Sweeps Shape *Caenorhabditis Elegans* Genomic  
497 Diversity.” *Nature Genetics* 44 (3): 285–90.
- 498 Bozinovic, Francisco, Nadia R. Medina, José M. Alruiz, Grisel Cavieres, and Pablo  
499 Sabat. 2016. “Thermal Tolerance and Survival Responses to Scenarios of  
500 Experimental Climatic Change: Changing Thermal Variability Reduces the Heat  
501 and Cold Tolerance in a Fly.” *Journal of Comparative Physiology. B, Biochemical,  
502 Systemic, and Environmental Physiology* 186 (5): 581–87.
- 503 Cingolani, Pablo, Adrian Platts, Le Lily Wang, Melissa Coon, Tung Nguyen, Luan Wang,  
504 Susan J. Land, Xiangyi Lu, and Douglas M. Ruden. 2012. “A Program for  
505 Annotating and Predicting the Effects of Single Nucleotide Polymorphisms, SnpEff:  
506 SNPs in the Genome of *Drosophila Melanogaster* Strain w1118; Iso-2; Iso-3.” *Fly* 6  
507 (2): 80–92.
- 508 Cook, Daniel E., Stefan Zdraljevic, Robyn E. Tanny, Beomseok Seo, David D. Riccardi,  
509 Luke M. Noble, Matthew V. Rockman, *et al.* 2016. “The Genetic Basis of Natural  
510 Variation in *Caenorhabditis Elegans* Telomere Length.” *Genetics*, July.  
511 doi:10.1534/genetics.116.191148.
- 512 Endelman, J. B. 2011. “Ridge Regression and Other Kernels for Genomic Selection with  
513 R Package rrBLUP.” *The Plant Genome*. dl.sciencesocieties.org.  
514 <https://dl.sciencesocieties.org/publications/tpg/abstracts/4/3/250>.

- 515 Félix, Marie-Anne, and Christian Braendle. 2010. "The Natural History of *Caenorhabditis*  
516 *Elegans*." *Current Biology: CB* 20 (22): R965–69.
- 517 Frézal, Lise, and Marie-Anne Félix. 2015. "C. *Elegans* Outside the Petri Dish." *eLife* 4  
518 (March). doi:10.7554/eLife.05849.
- 519 Gerken, Alison R., Olivia C. Eller, Daniel A. Hahn, and Theodore J. Morgan. 2015.  
520 "Constraints, Independence, and Evolution of Thermal Plasticity: Probing Genetic  
521 Architecture of Long- and Short-Term Thermal Acclimation." *Proceedings of the*  
522 *National Academy of Sciences of the United States of America* 112 (14): 4399–  
523 4404.
- 524 Hangartner, Sandra B., Ary A. Hoffmann, Ailie Smith, and Philippa C. Griffin. 2015. "A  
525 Collection of Australian *Drosophila* Datasets on Climate Adaptation and Species  
526 Distributions." *Scientific Data* 2 (November): 150067.
- 527 Hijmans, R. J., E. Williams, and C. Vennes. 2012. "Geosphere: Spherical Trigonometry.  
528 R Package Version 1.2–28." *CRAN. R-Project. Org/package= Geosphere*.
- 529 Hirschhorn, Joel N., and Mark J. Daly. 2005. "Genome-Wide Association Studies for  
530 Common Diseases and Complex Traits." *Nature Reviews. Genetics* 6 (2): 95–108.
- 531 Hodgkin, J., and T. Doniach. 1997. "Natural Variation and Copulatory Plug Formation in  
532 *Caenorhabditis Elegans*." *Genetics* 146 (1): 149–64.
- 533 Hutchinson, G. E. 1957. "Cold Spring Harbor Symposium on Quantitative Biology."  
534 *Concluding Remarks*.
- 535 Iannone, Richard. 2015. "stationaRy: Get Hourly Meteorological Data from Global  
536 Stations. R Package Version 0.4.1." *CRAN. R-Project. Org/package= stationaRy*,  
537 October. Comprehensive R Archive Network (CRAN).



- 538 “Integrated Surface Global Hourly Data - NOAA Data Catalog.” 2016. Accessed  
539 September 2. <https://data.noaa.gov/dataset/integrated-surface-global-hourly-data>.
- 540 Kang, Hyun Min, Noah A. Zaitlen, Claire M. Wade, Andrew Kirby, David Heckerman,  
541 Mark J. Daly, and Eleazar Eskin. 2008. “Efficient Control of Population Structure in  
542 Model Organism Association Mapping.” *Genetics* 178 (3): 1709–23.
- 543 Li, Heng, and Richard Durbin. 2009. “Fast and Accurate Short Read Alignment with  
544 Burrows–Wheeler Transform.” *Bioinformatics* 25 (14): 1754–60.
- 545 Li, Heng, Bob Handsaker, Alec Wysoker, Tim Fennell, Jue Ruan, Nils Homer, Gabor  
546 Marth, Goncalo Abecasis, Richard Durbin, and 1000 Genome Project Data  
547 Processing Subgroup. 2009. “The Sequence Alignment/Map Format and  
548 SAMtools.” *Bioinformatics* 25 (16): 2078–79.
- 549 Machado, Heather E., Alan O. Bergland, Katherine R. O’Brien, Emily L. Behrman, Paul  
550 S. Schmidt, and Dmitri A. Petrov. 2016. “Comparative Population Genomics of  
551 Latitudinal Variation in *Drosophila Simulans* and *Drosophila Melanogaster*.”  
552 *Molecular Ecology* 25 (3): 723–40.
- 553 Saltz, Julia B., and Sergey V. Nuzhdin. 2014. “Genetic Variation in Niche Construction:  
554 Implications for Development and Evolutionary Genetics.” *Trends in Ecology &  
555 Evolution* 29 (1): 8–14.
- 556 Sterken, Mark G., L. Basten Snoek, Jan E. Kammenga, and Erik C. Andersen. 2015.  
557 “The Laboratory Domestication of *Caenorhabditis Elegans*.” *Trends in Genetics:  
558 TIG* 31 (5): 224–31.
- 559 Taylor, Michelle L., Alison Skeats, Alastair J. Wilson, Tom A. R. Price, and Nina Wedell.  
560 2015. “Opposite Environmental and Genetic Influences on Body Size in North

561 American *Drosophila Pseudoobscura*.” *BMC Evolutionary Biology* 15 (March): 51.  
562 Tyukmaeva, Venera I., Paris Veltsos, Jon Slate, Emma Gregson, Hannele Kauranen,  
563 Maaria Kankare, Michael G. Ritchie, Roger K. Butlin, and Anneli Hoikkala. 2015.  
564 “Localization of Quantitative Trait Loci for Diapause and Other Photoperiodically  
565 Regulated Life History Traits Important in Adaptation to Seasonally Varying  
566 Environments.” *Molecular Ecology* 24 (11): 2809–19.

567

## FIGURE LEGENDS

568 **Figure 1. Global distribution of wild isolates and NOAA weather stations.** A) Map  
569 of 27,447 ISD NOAA weather stations (blue) and 149 *C. elegans* wild isolate locations  
570 (red). Three isotypes are not depicted as they have no known location of isolation. B)  
571 Histogram of station distance from wild isolate, measured in kilometers (km). Data from  
572 the three-year weather dataset are shown.

573

574 **Figure 2. Genome-wide association of elevation.** A) Genome-wide association of  
575 elevation of strain isolation shown as Manhattan plots. Genomic position is plotted on  
576 the x-axis against the negative log-transformed  $p$ -value on the y-axis. Single nucleotide  
577 variants (SNVs) that are above the Bonferroni-corrected significance threshold,  
578 indicated by the dotted grey line, are shown in red and SNVs below the Bonferroni  
579 threshold are shown in black. Confidence intervals are represented by the pink bars. B)  
580 Box plots show strain isolation elevations, measured in meters (m), separated by the  
581 genotype at the peak marker location. Each point represents one strain. The reference  
582 genotype (REF) refers to strains that share the genotype of the reference strain, N2.  
583 The alternative genotype (ALT) refers to all other strains that do not have the reference  
584 genotype at the peak marker position.

585

586 **Figure 3. Genome-wide association of humidity traits.** Genome-wide association of  
587 relative humidity for three different time periods are visualized as Manhattan plots:  
588 three-month (A), one-year (B), three-year (c) durations. Genomic position is plotted on  
589 the x-axis against the negative log-transformed  $p$ -value on the y-axis. SNVs that are

590 above the Bonferroni-corrected significance threshold, indicated by the dotted grey line,  
591 are shown in red and SNVs below the Bonferroni threshold are shown in black.  
592 Confidence intervals are represented by the pink bars.

593

594 **Figure 4. Genome-wide association of temperature.** A) Genome-wide association of  
595 three-year average temperature is visualized as a Manhattan plot. Genomic position is  
596 plotted on the x-axis against the negative log-transformed  $p$ -value on the y-axis. SNVs  
597 that are above the Bonferroni-corrected significance threshold, indicated by the dotted  
598 grey line, are shown in red, and SNVs below the Bonferroni threshold are shown in  
599 black. Confidence intervals are represented by the pink bars. B) Box plots show the  
600 strain three-year average temperatures, measured in degrees Celsius, separated by  
601 genotype at the peak marker locus. Each point represents one strain. The reference  
602 genotype (REF) refers to strains that share the genotype of the reference strain, N2.  
603 The alternative genotype (ALT) refers to all other strains that do not have the reference  
604 genotype at the peak marker position.

605

606 **Figure 5. Two-strain temperature competition assay.** JU847 (isolated at low  
607 temperature) was competed against CX11314 (isolated at high temperature) at both  
608 15°C (indicated in blue) and 25°C (indicated in red). The mean frequency of the JU847  
609 allele in the population is plotted on the y-axis. Error bars represent one standard  
610 deviation from the mean. Data were collected from nine experimental and five technical  
611 replicates.

612

613 **Table 1. Definition of geographic and weather traits<sup>a</sup>**

| Trait name                         | Trait code <sup>b</sup> | Number of strains <sup>c</sup> | Description                                                                                                                                                                                                                   |
|------------------------------------|-------------------------|--------------------------------|-------------------------------------------------------------------------------------------------------------------------------------------------------------------------------------------------------------------------------|
| <b>Latitude</b>                    | latitude                | 149                            | Latitude coordinate where the nematode strain was collected (degrees)                                                                                                                                                         |
| <b>Abs. value of latitude</b>      | abslat                  | 149                            | Absolute value of the latitude coordinate where the nematode strain was collected (degrees)                                                                                                                                   |
| <b>Longitude</b>                   | longitude               | 149                            | Longitude coordinate where the nematode strain was collected (degrees)                                                                                                                                                        |
| <b>Absolute value of longitude</b> | abslong                 | 149                            | Absolute value of the longitude coordinate where the nematode strain was collected (degrees)                                                                                                                                  |
| <b>Elevation</b>                   | elevation               | 149                            | Calculated elevation based on latitude/longitude coordinates using “geosphere” package (m)                                                                                                                                    |
| <b>Temperature</b>                 | temp                    | 145                            | Temperature of the air (°C)                                                                                                                                                                                                   |
| <b>Relative humidity</b>           | rh                      | 129                            | Amount of water vapor present in air expressed as a percentage of the amount needed for saturation at the same temperature (%)                                                                                                |
| <b>Wind direction</b>              | wd                      | 134                            | Angle, measured in a clockwise direction, between true north and the direction from which the wind is blowing (angular degrees)                                                                                               |
| <b>Wind speed</b>                  | ws                      | 136                            | Rate of horizontal travel of air past a fixed point (m/s)                                                                                                                                                                     |
| <b>Cloud height<sup>d</sup></b>    | ceil_hgt                | 122                            | Height above the ground level of the lowest cloud or obscuring phenomena layer with 5/8 or more summation total sky cover, which may be predominantly opaque, or the vertical visibility into a surface-based obstruction (m) |
| <b>Dew point</b>                   | dew_point               | 129                            | Temperature to which a given parcel of air must be cooled at constant pressure and water vapor content in order for saturation to occur (°C)                                                                                  |

614 <sup>a</sup>Definitions for traits obtained from the Federal Climate Complex Data Documentation for Integrated Surface Data  
 615 (August 20, 2015)

616 <sup>b</sup>Abbreviation for weather traits obtained from the raw data file format

617 <sup>c</sup>Number of wild isolates with data for each geographic and weather trait. Number of strains for the weather traits was  
 618 obtained from the three-month mapping dataset

619 <sup>d</sup>Cloud height data was only sufficient to analyze for the three-year dataset

**A**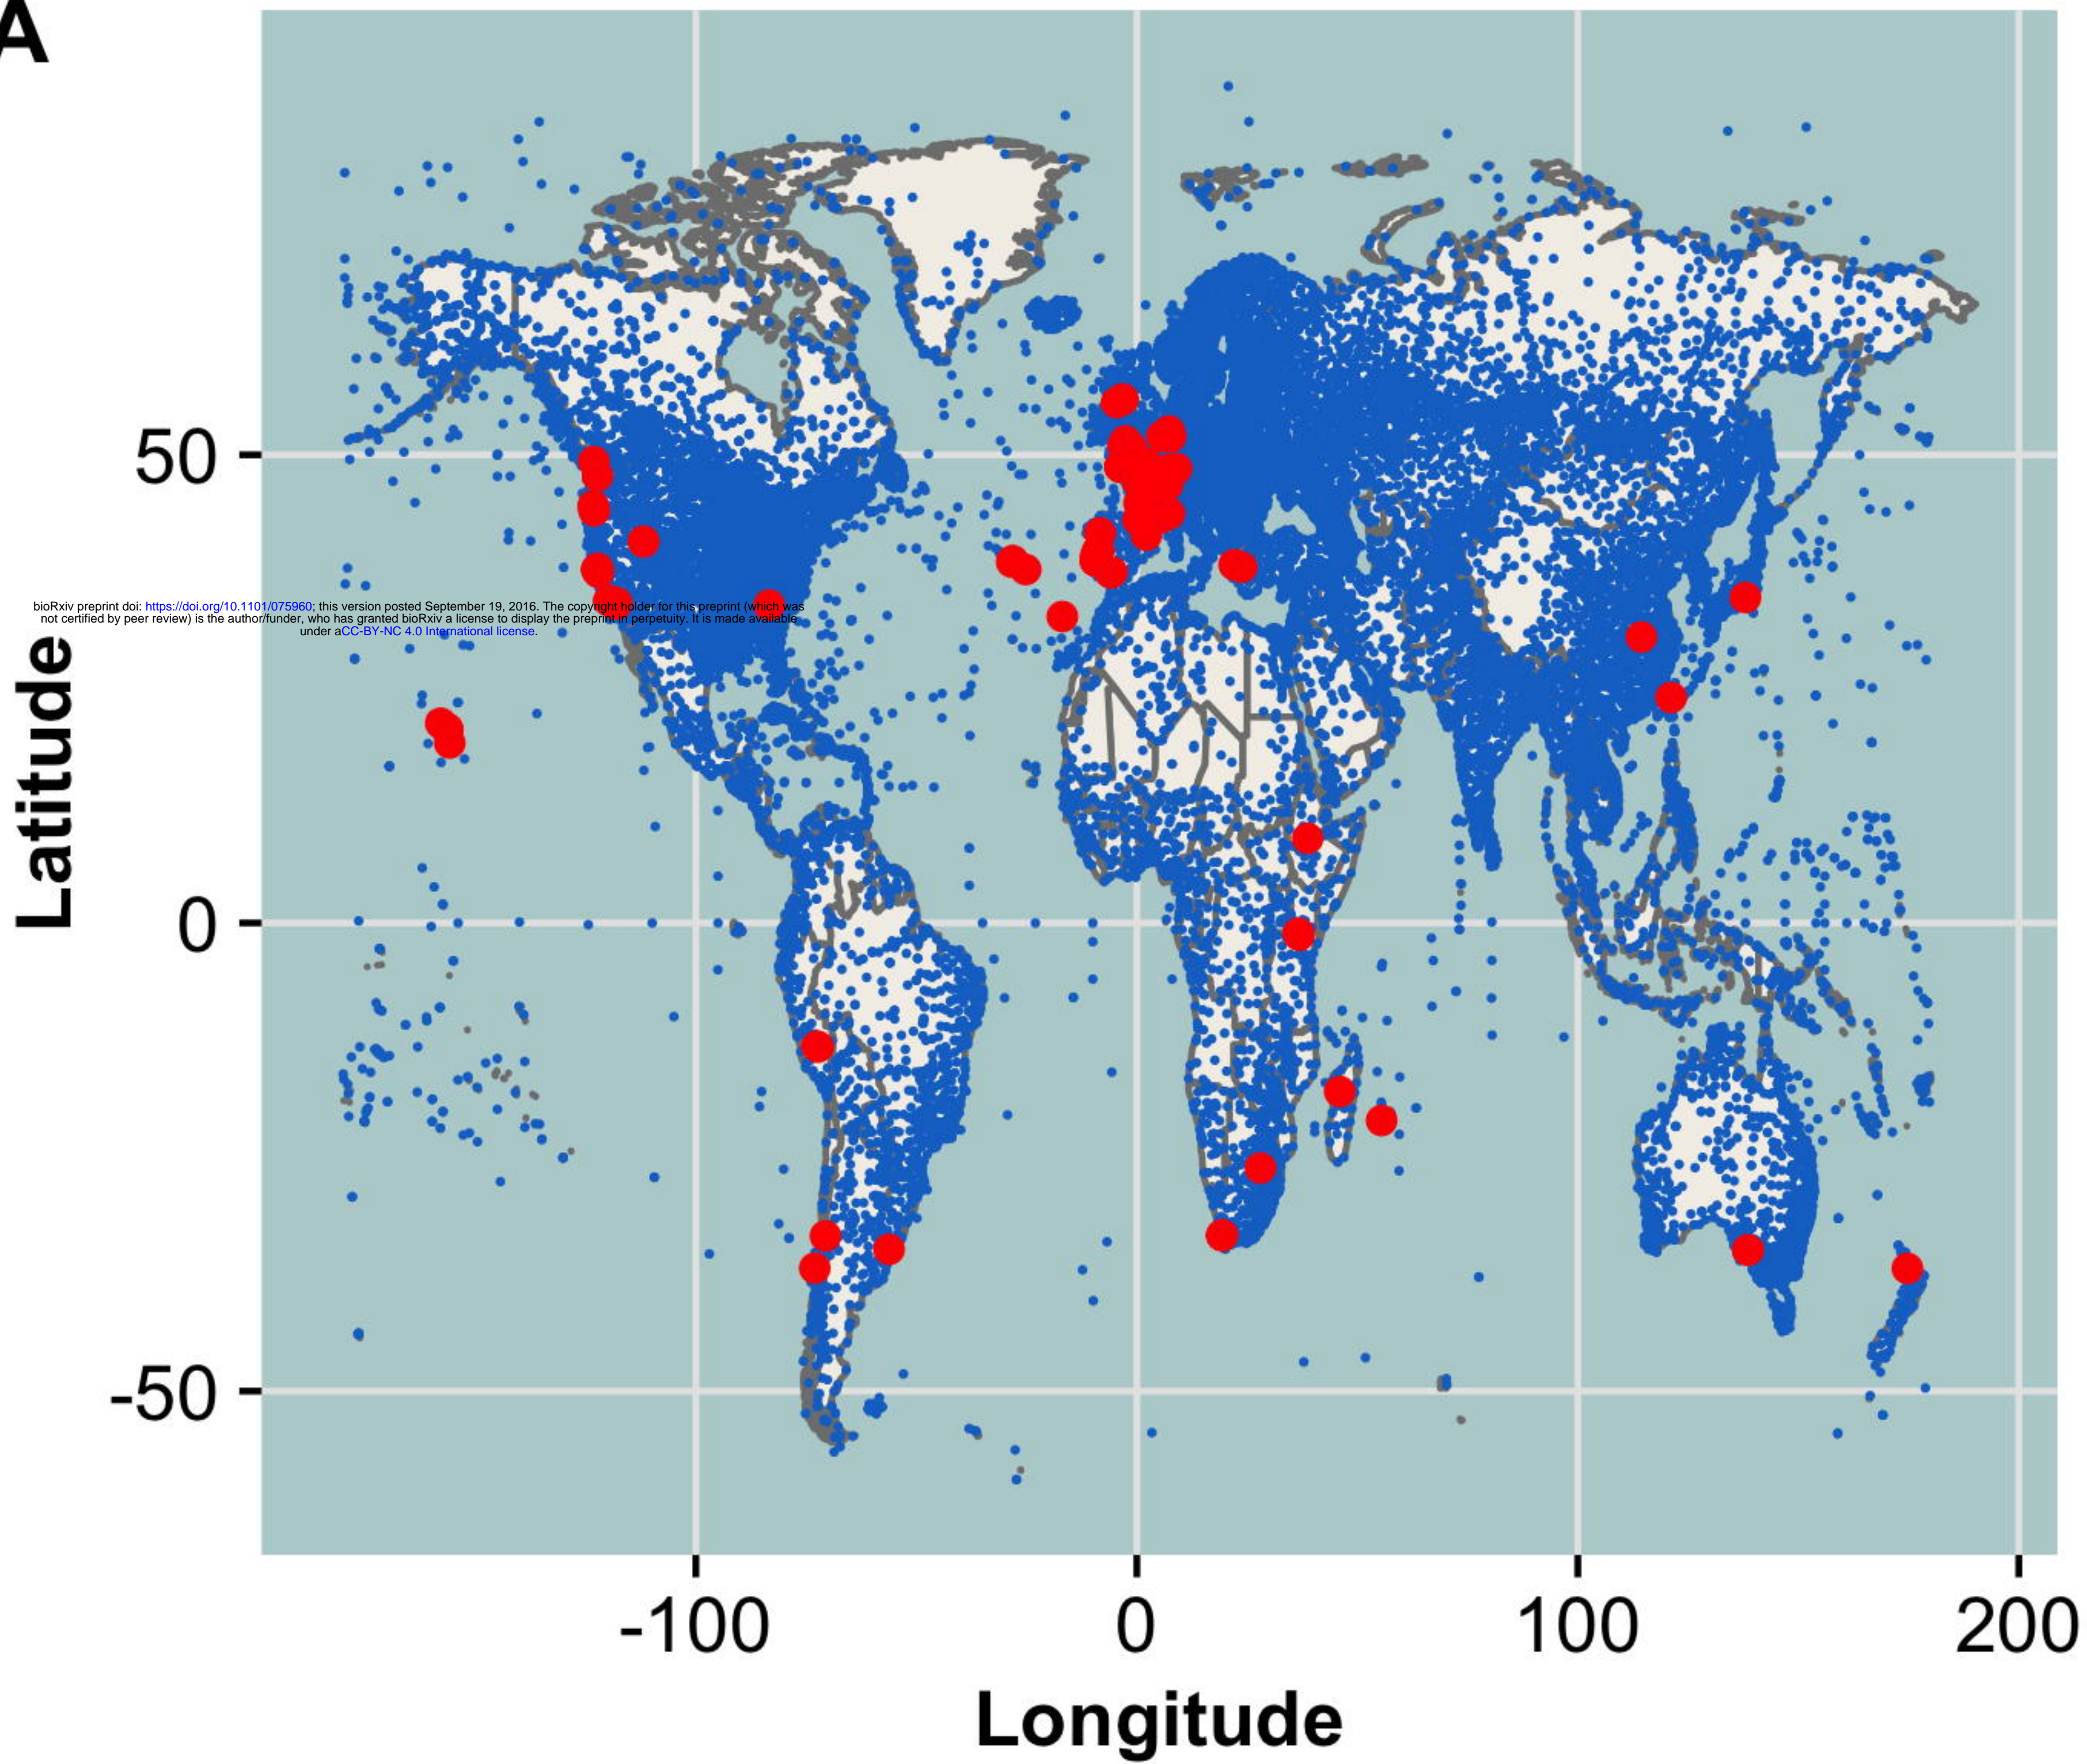**B**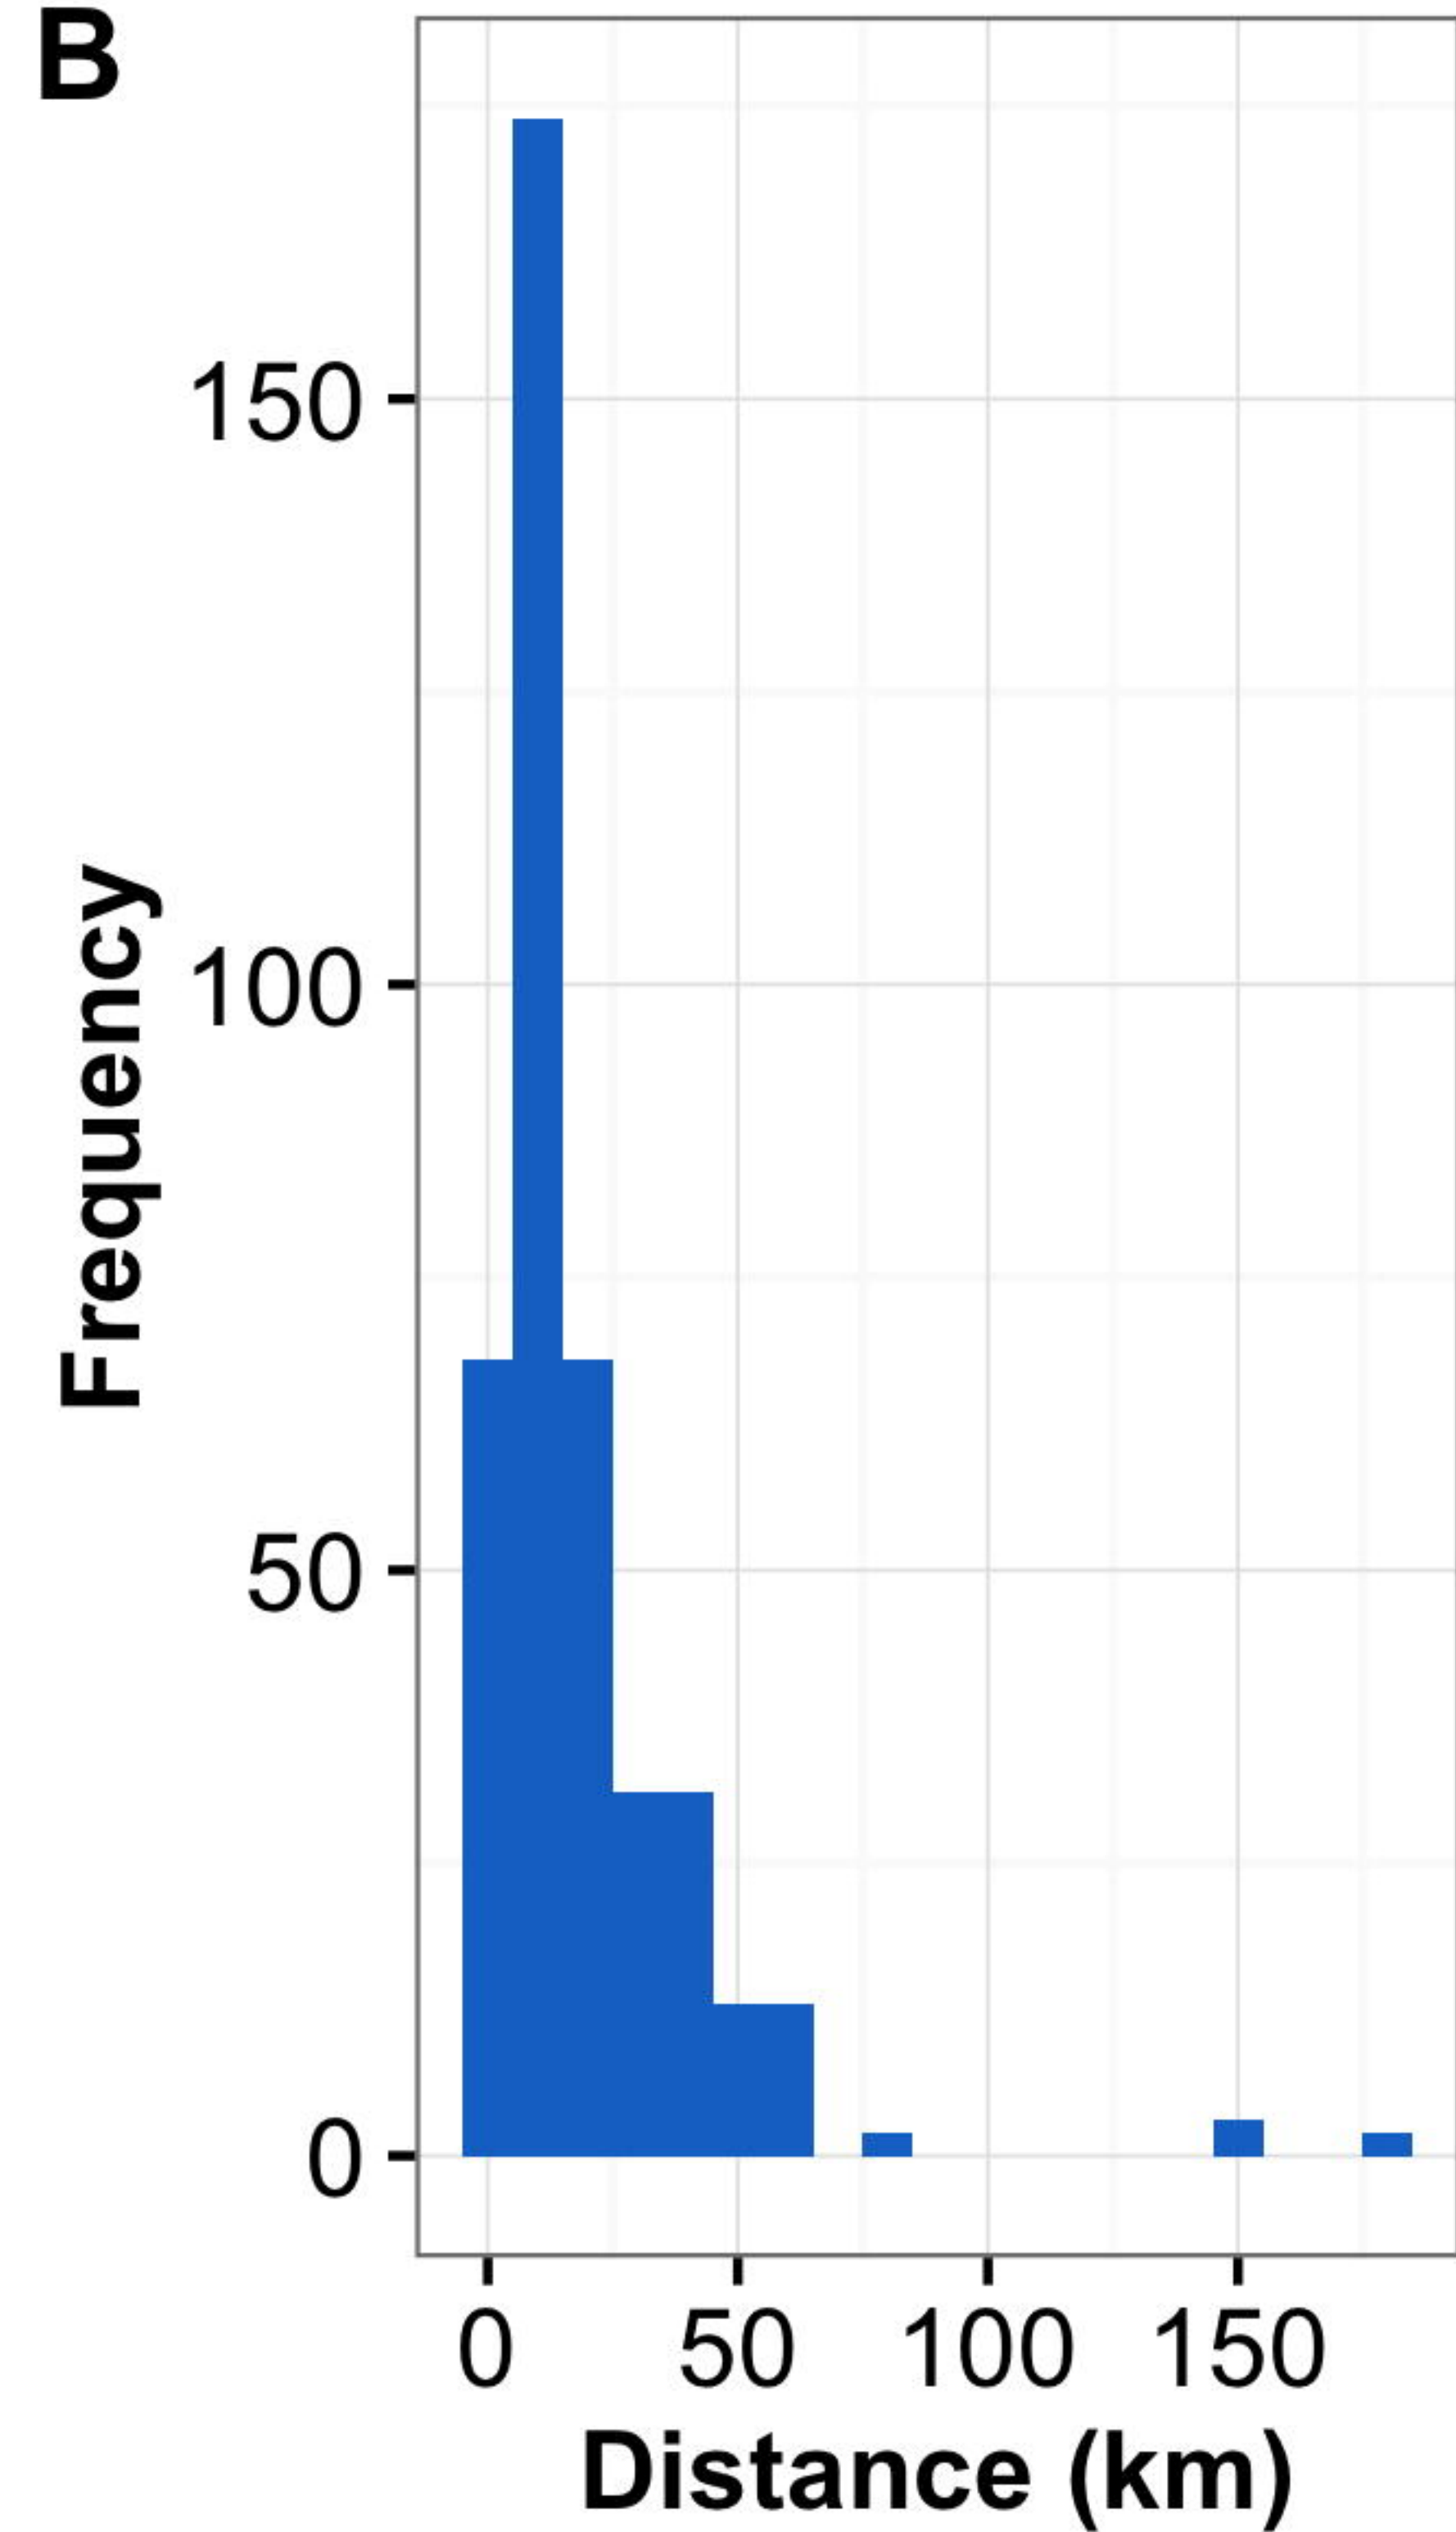

**A**

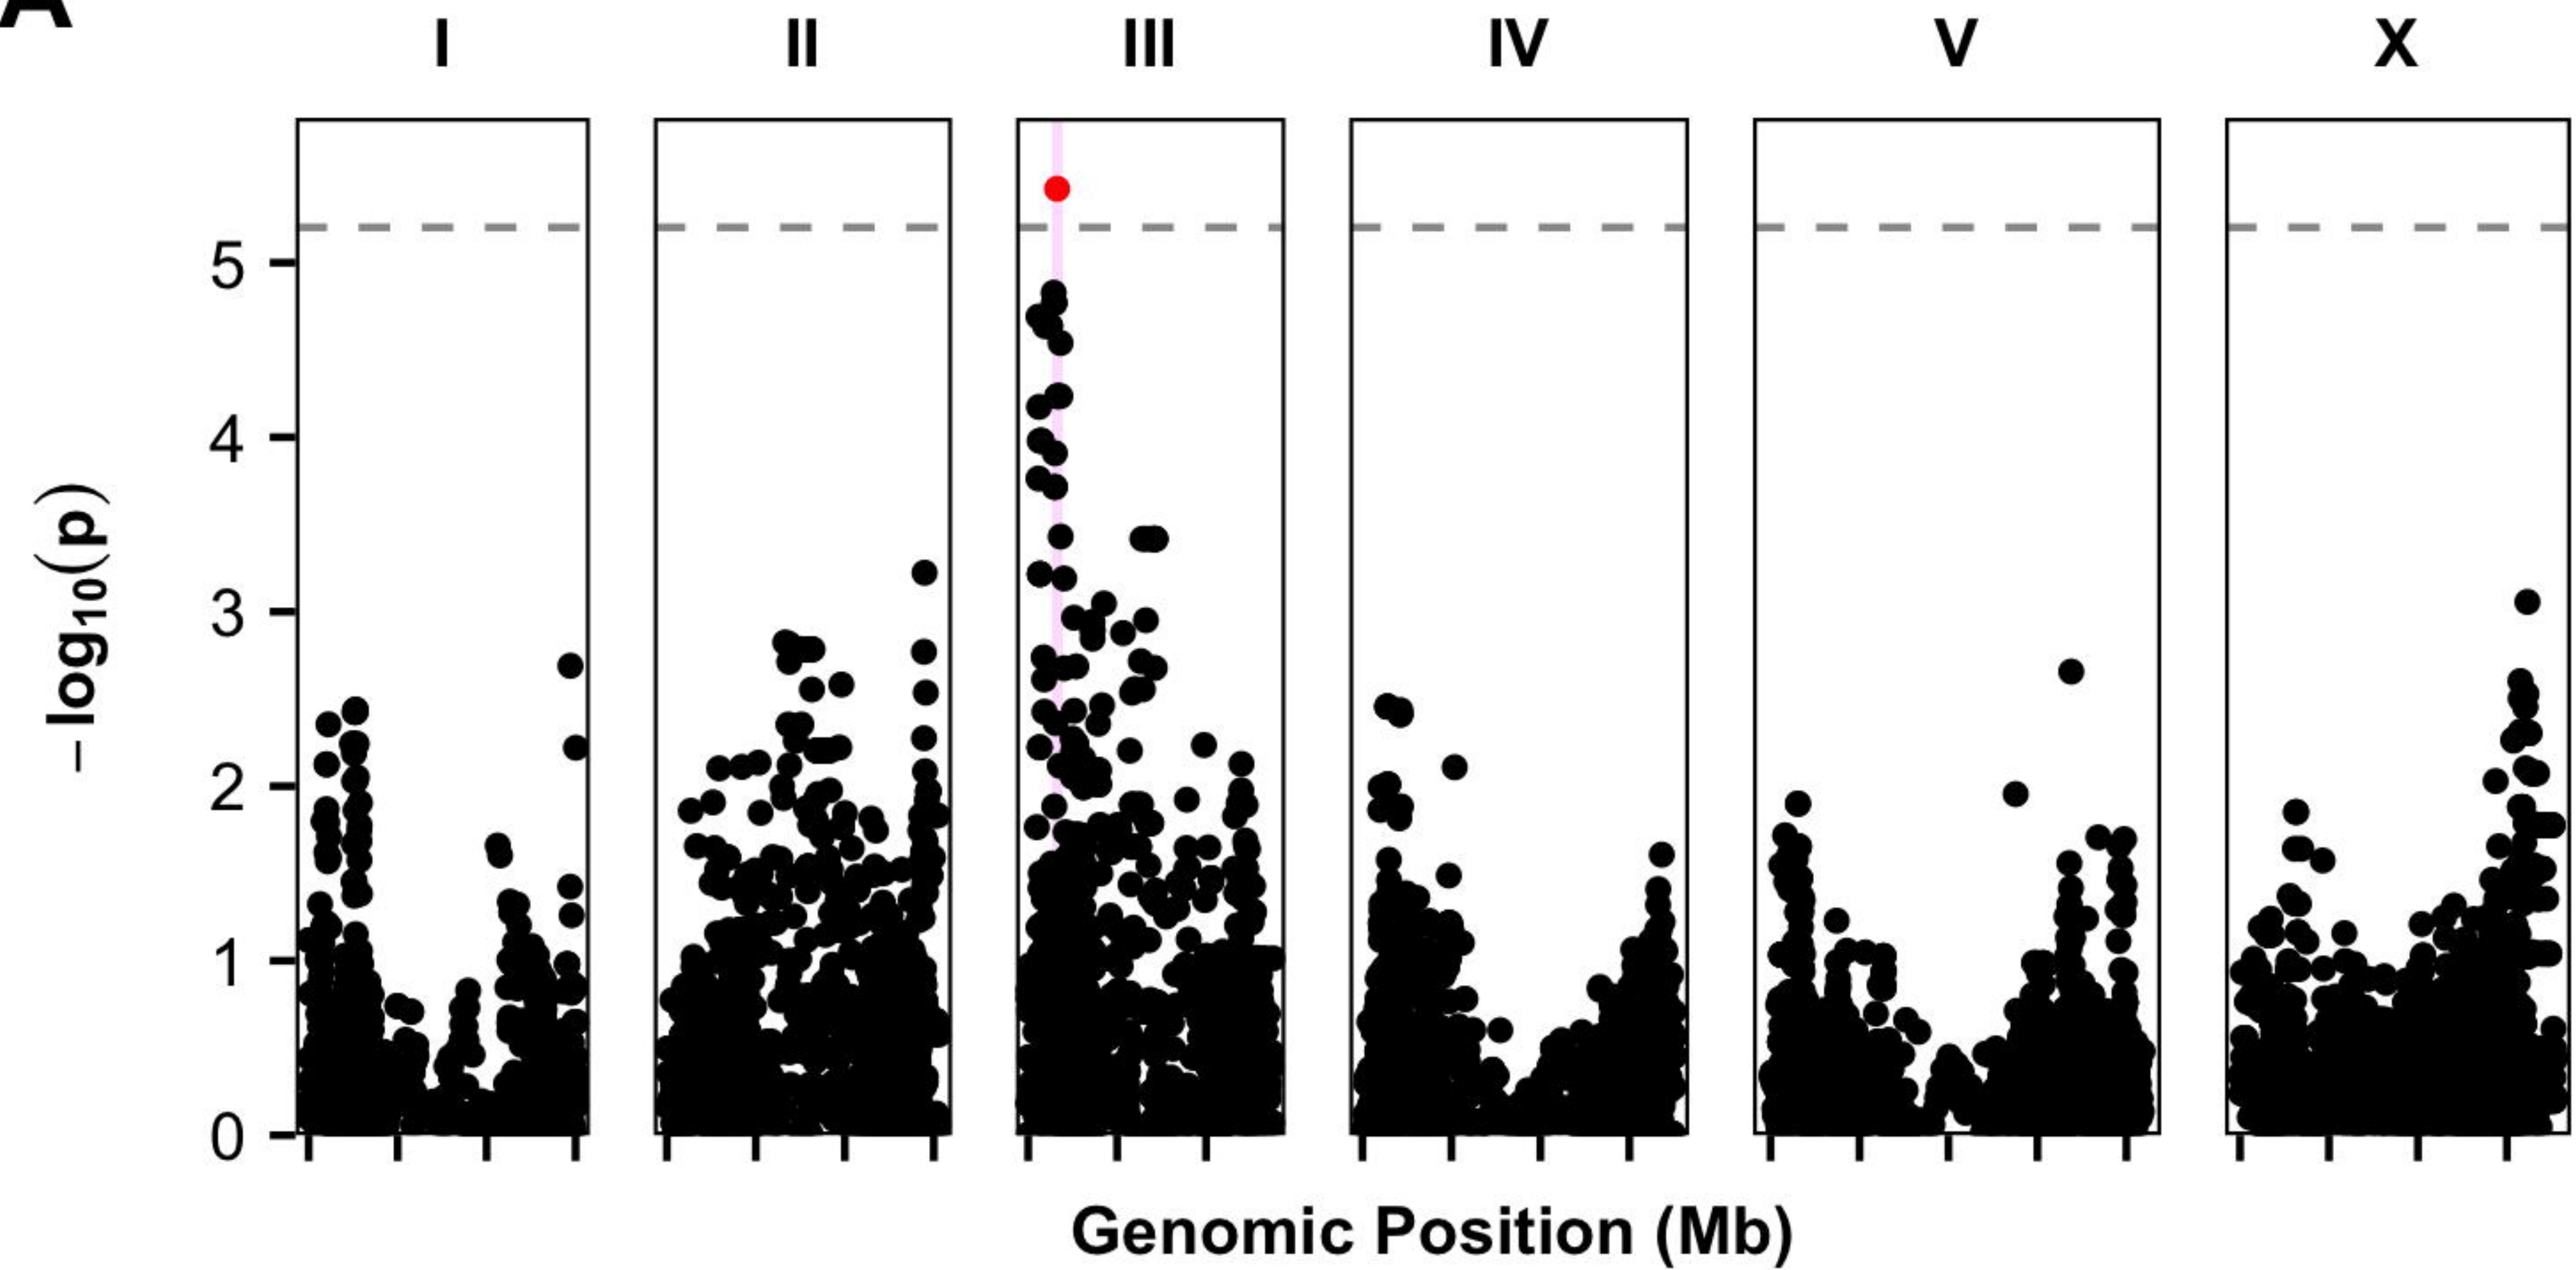

**B**

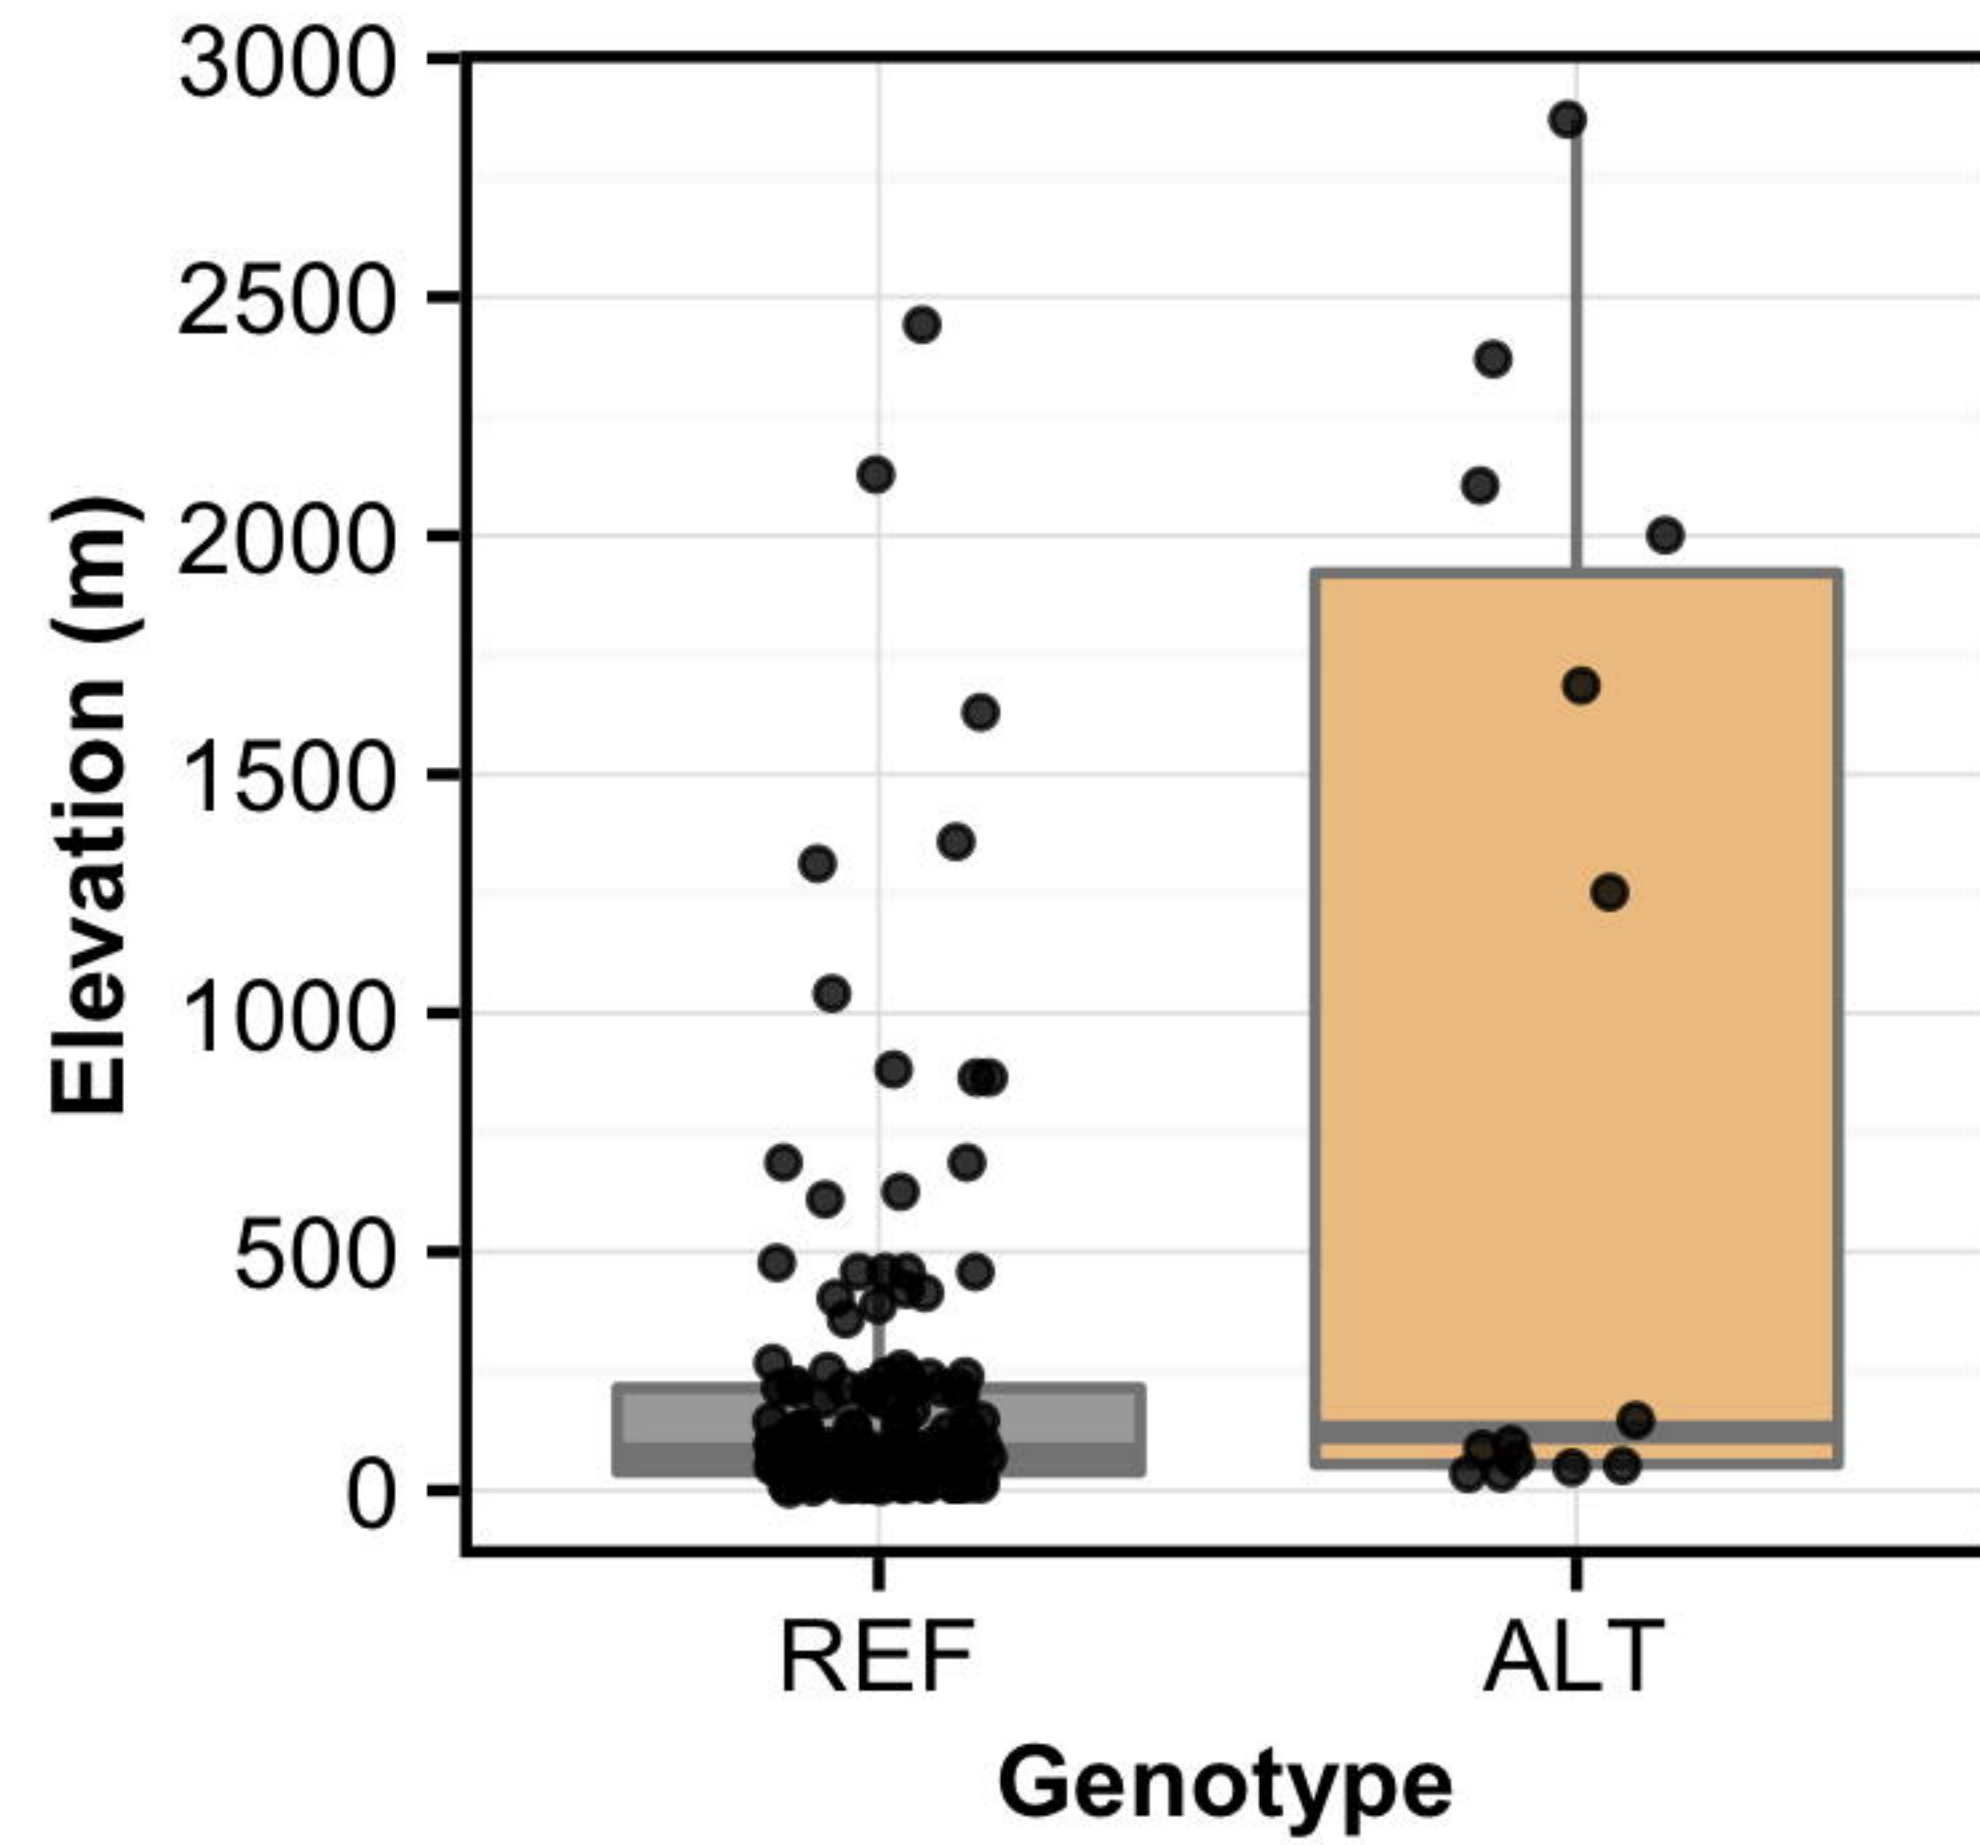

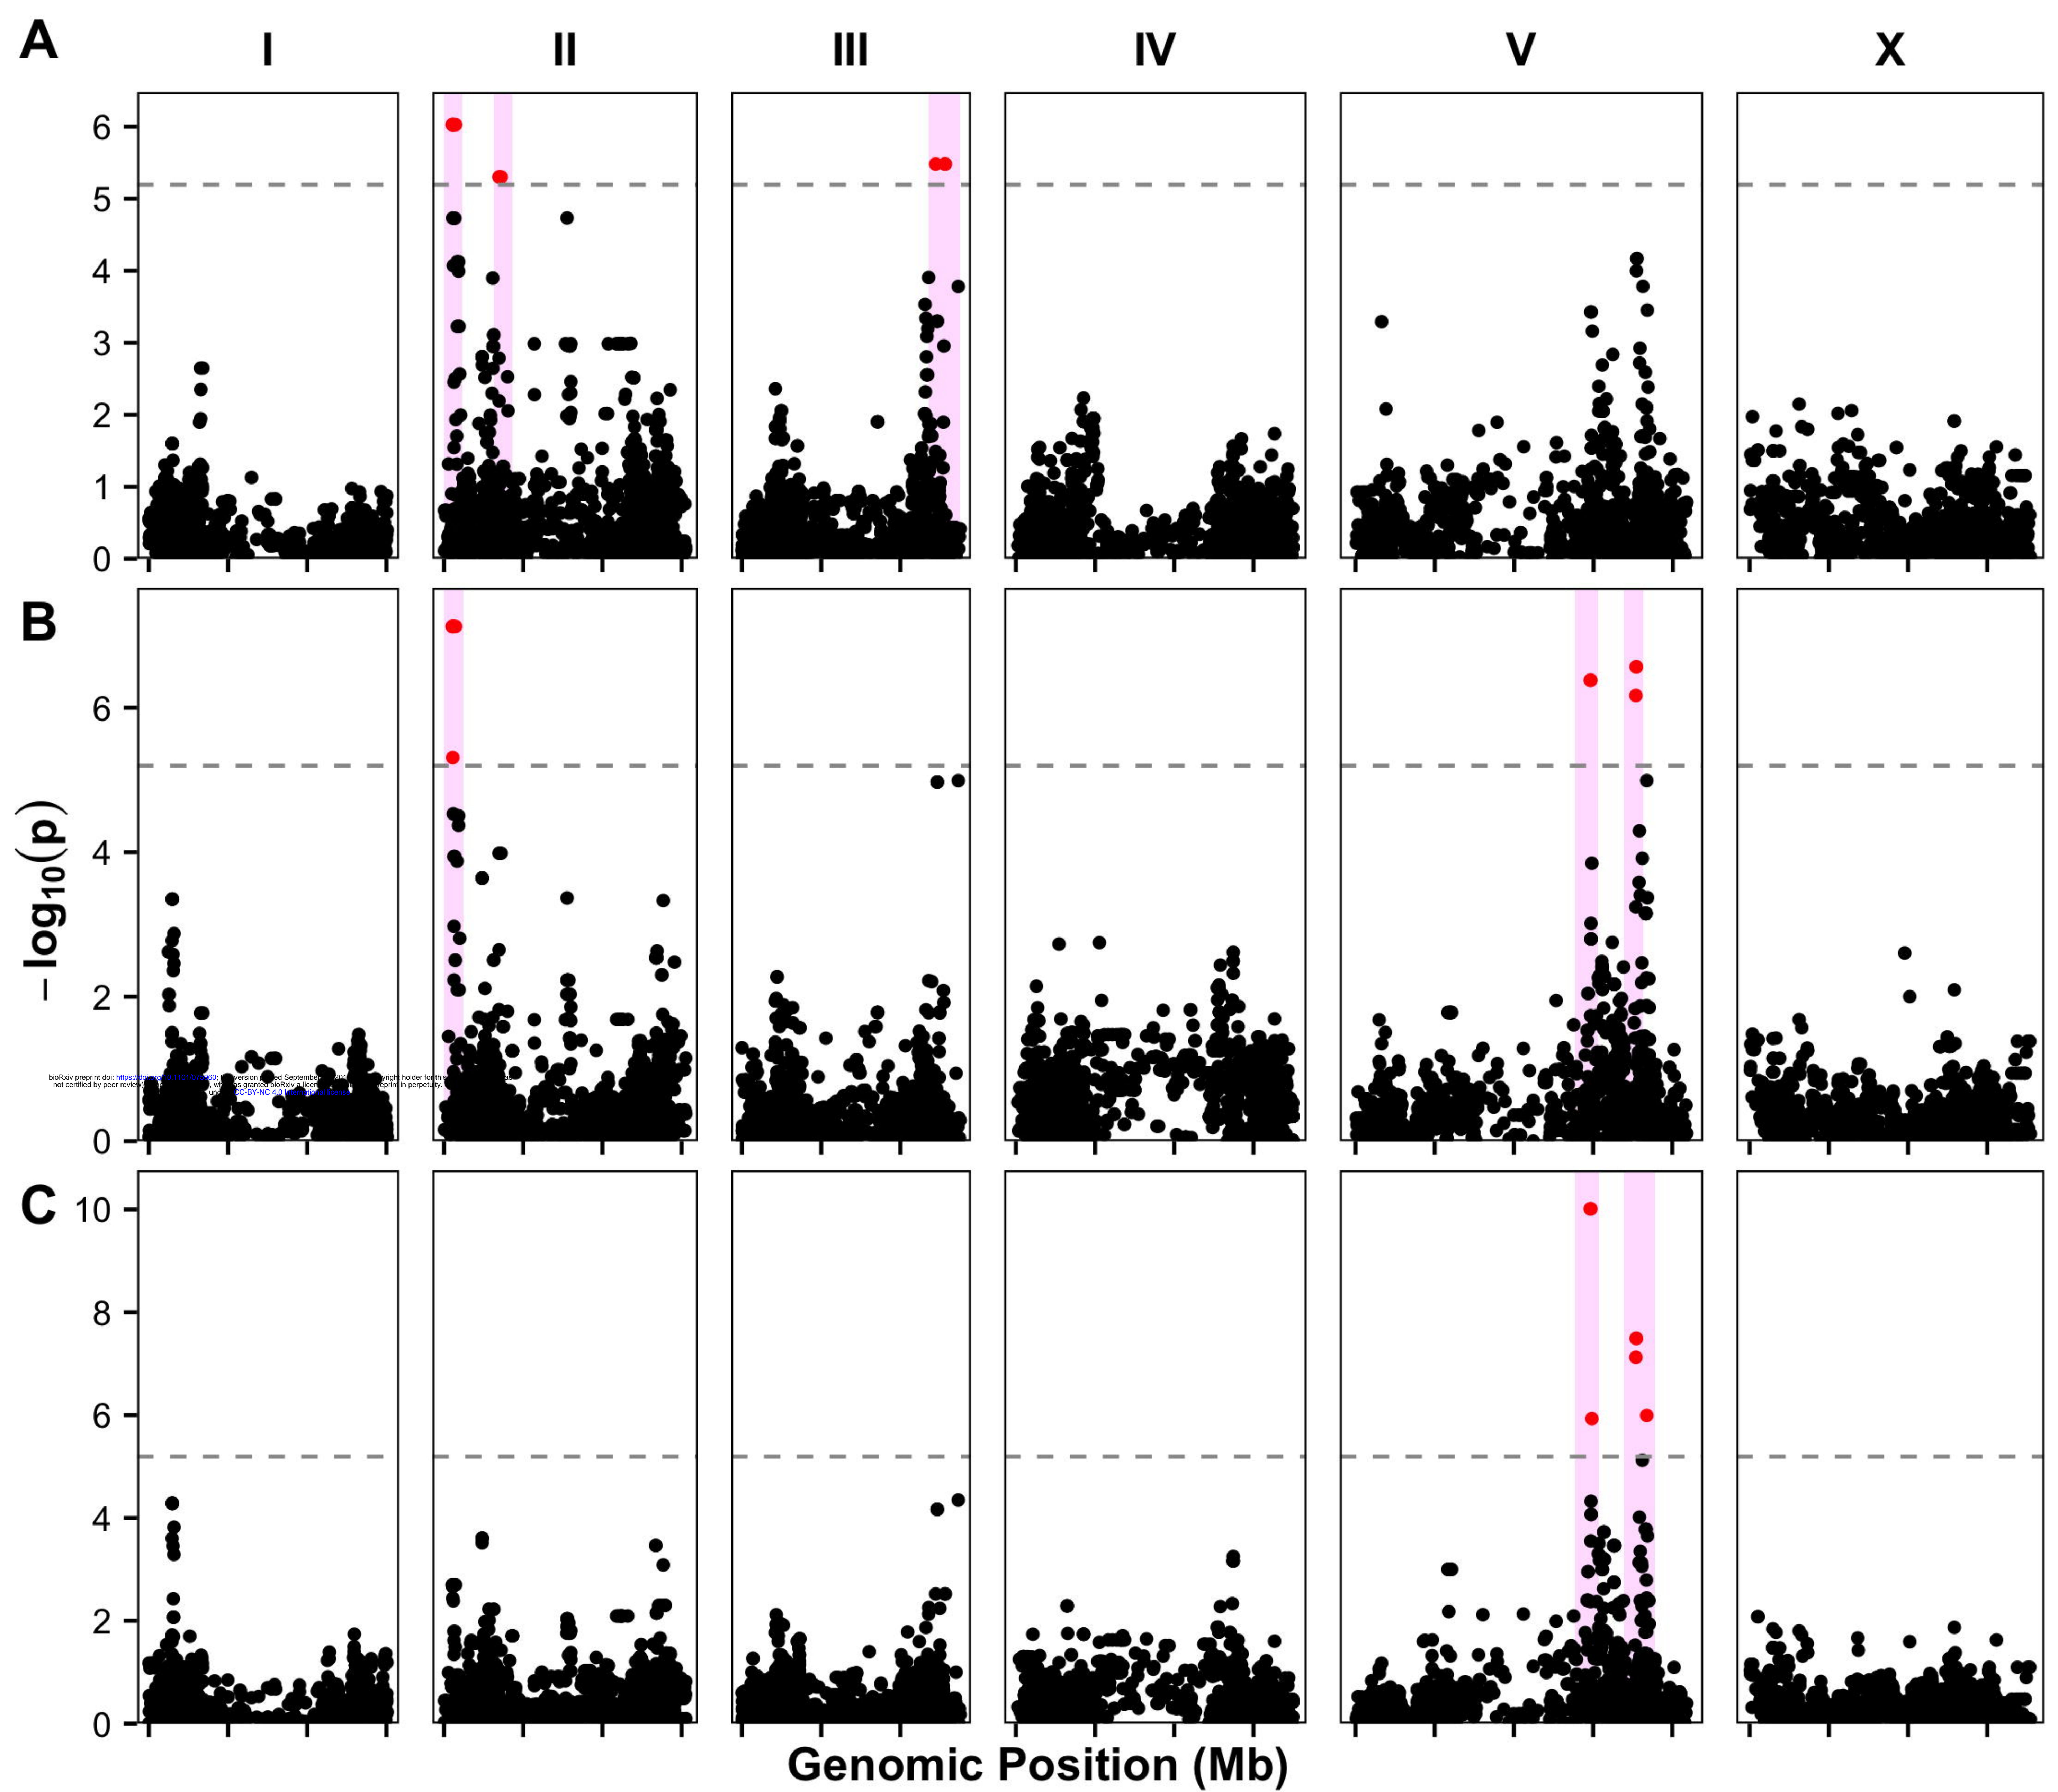



**A**

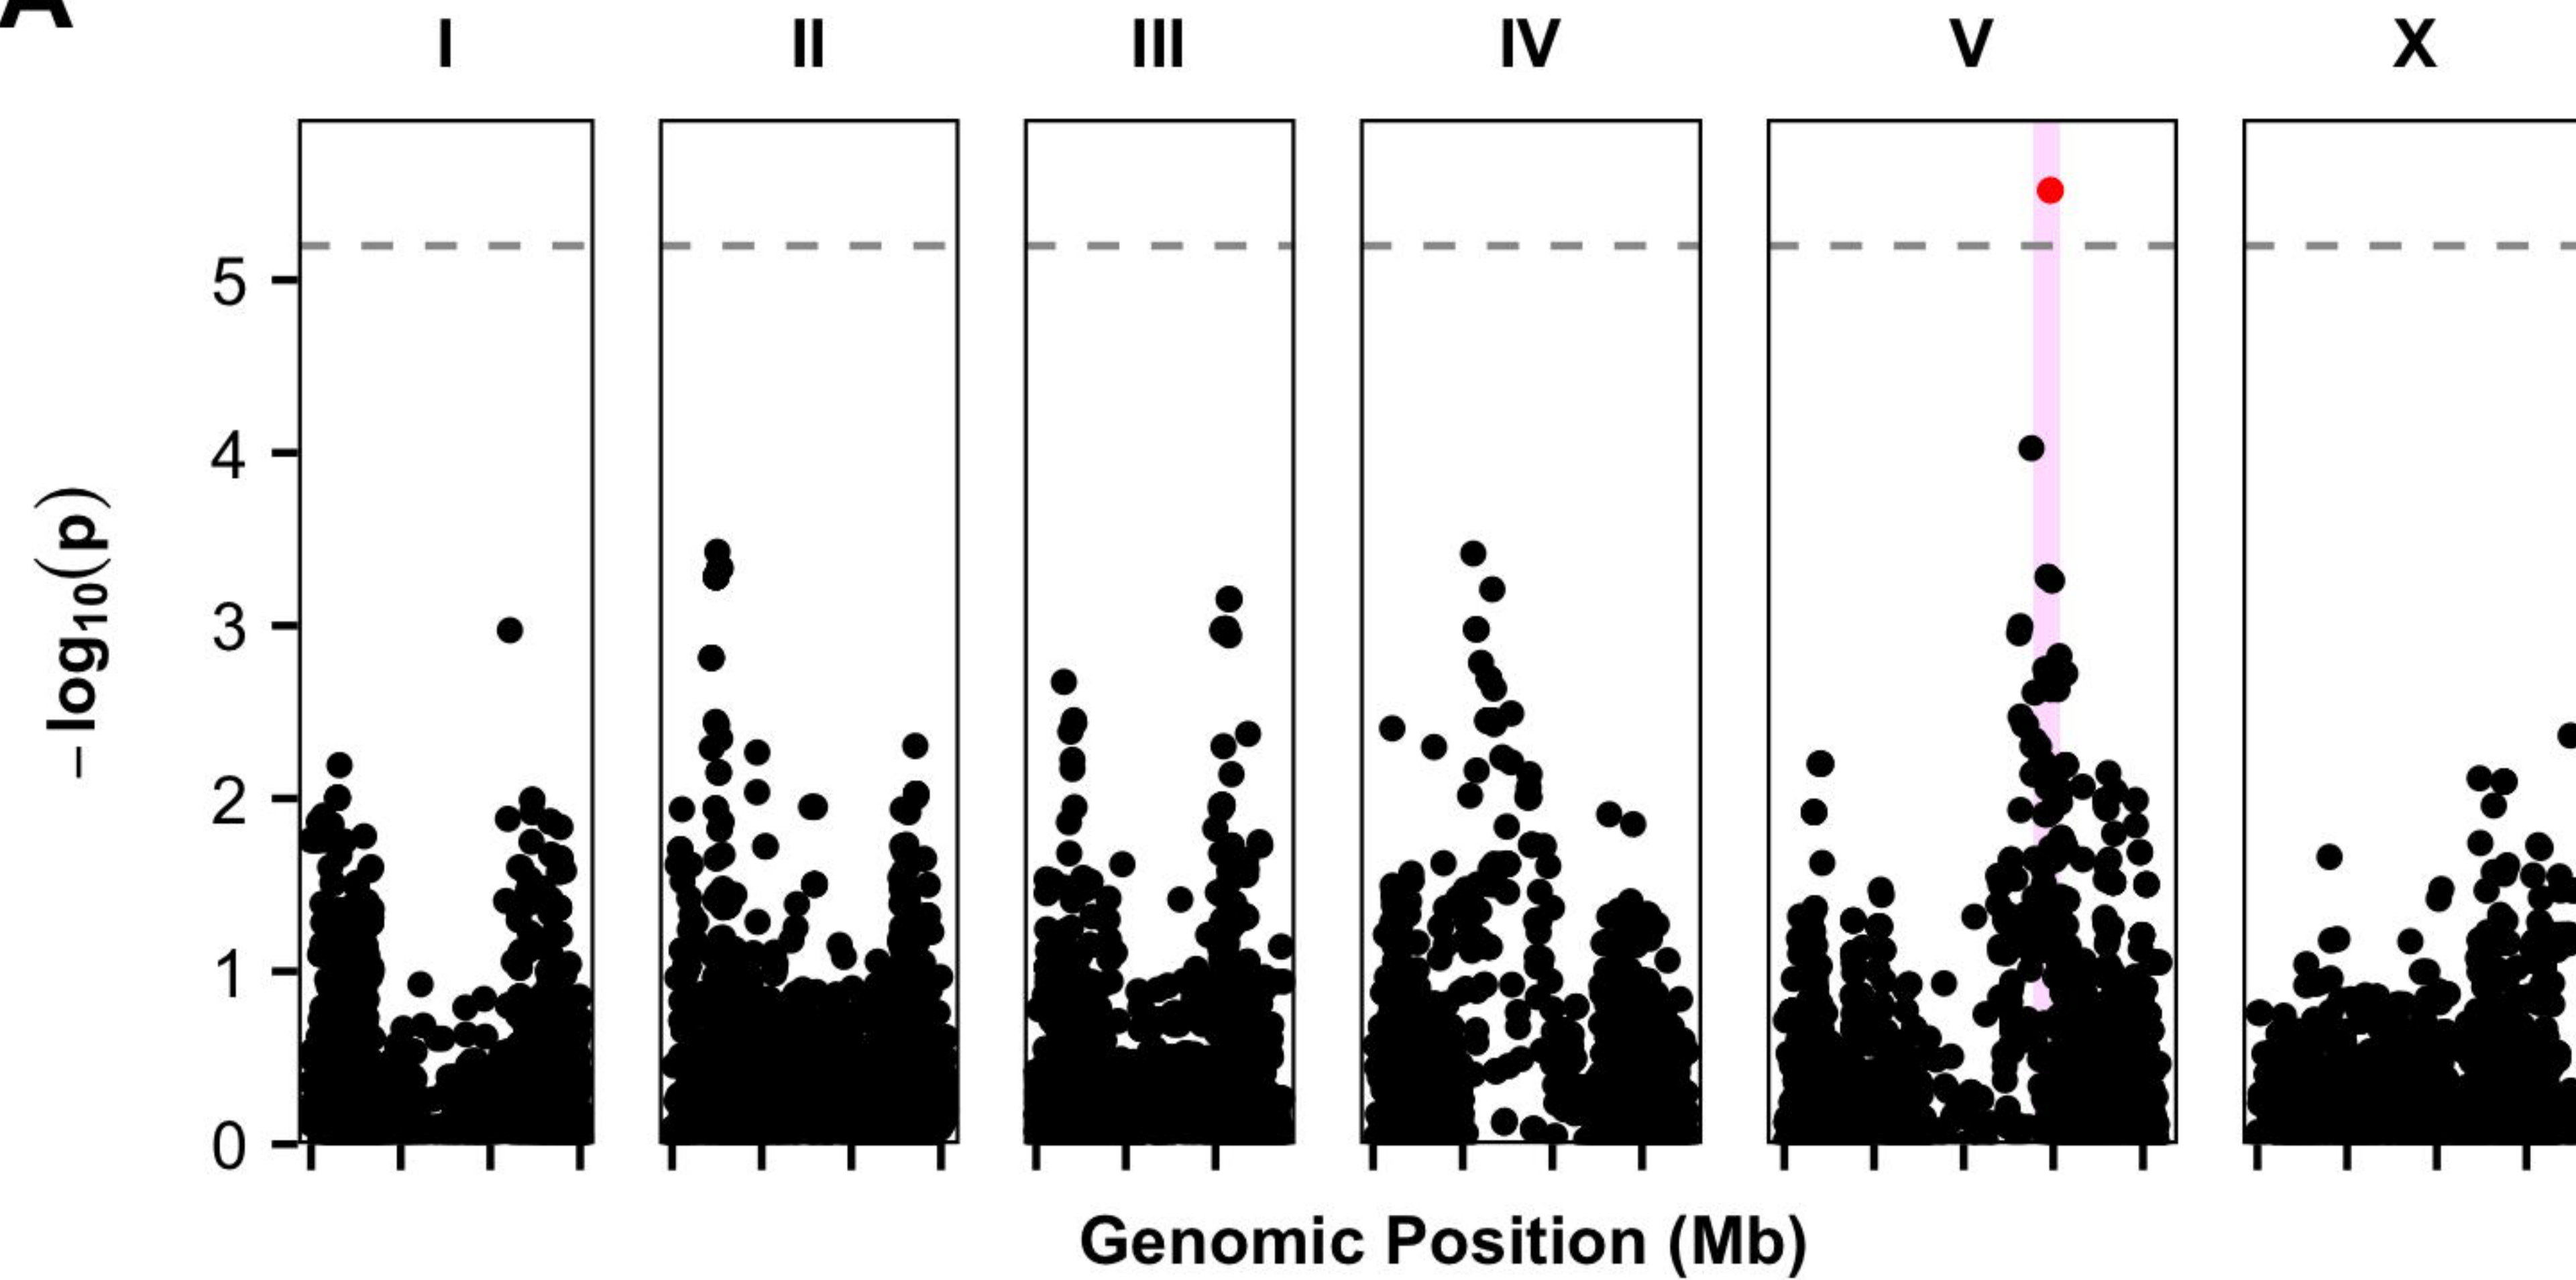

**B**

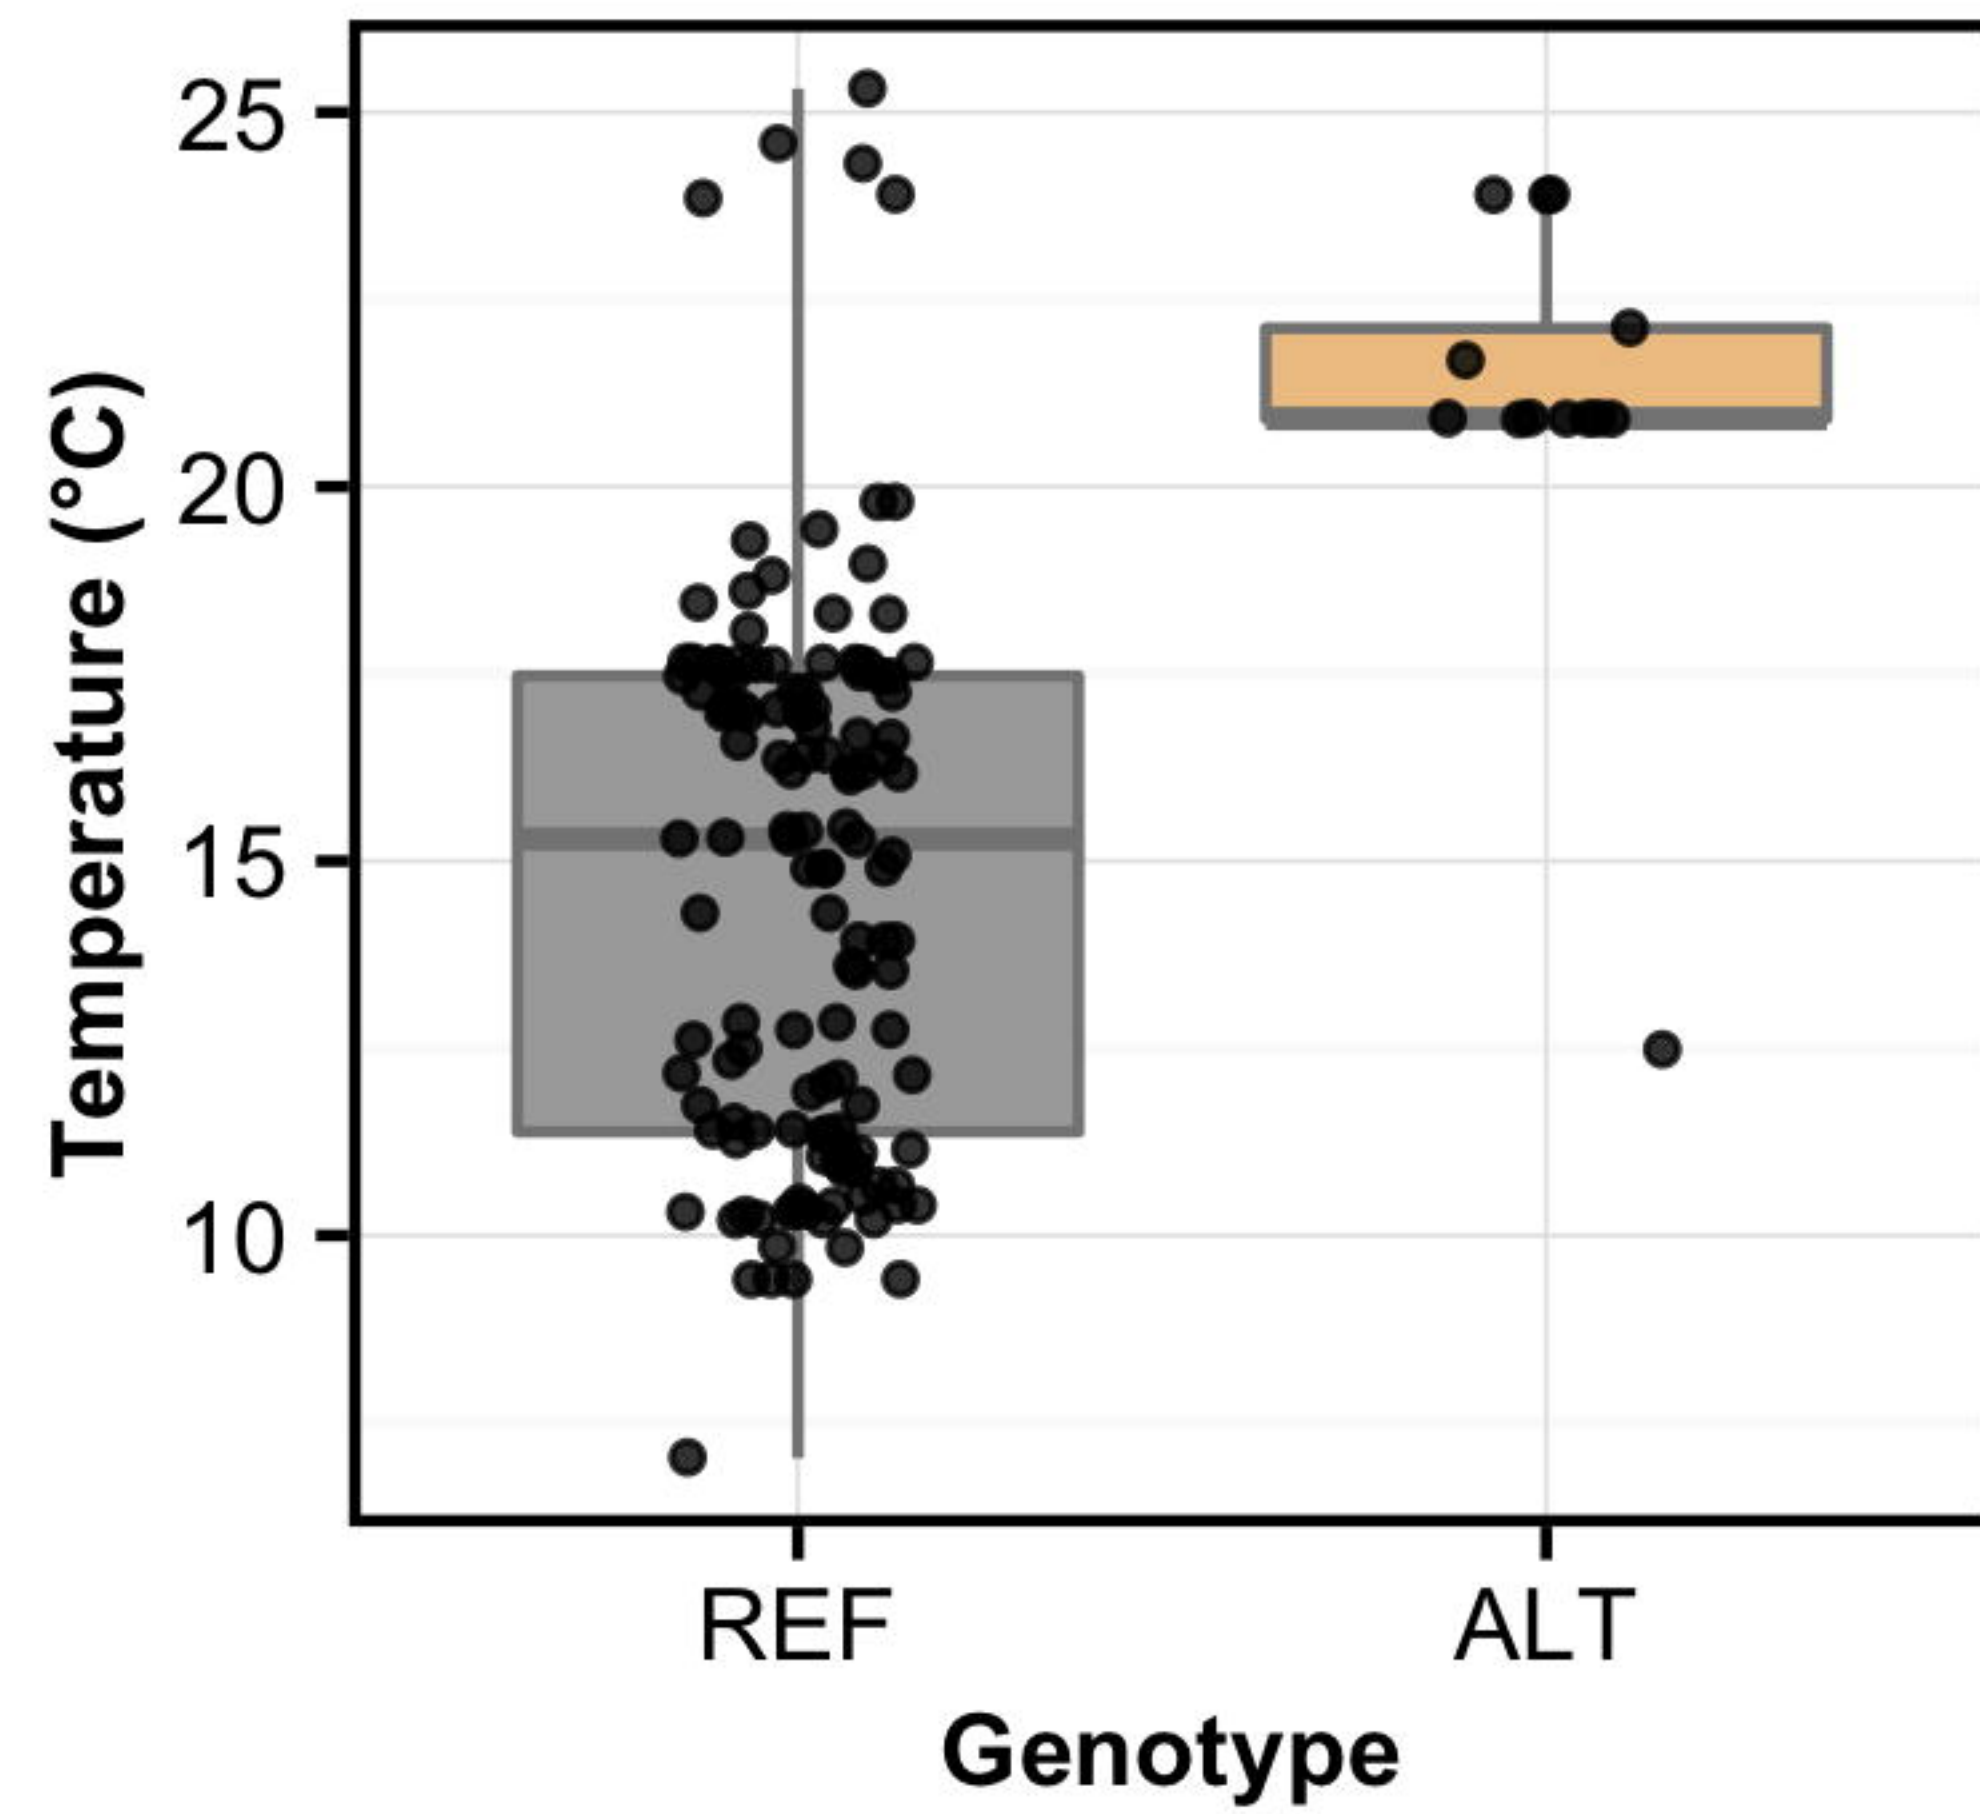

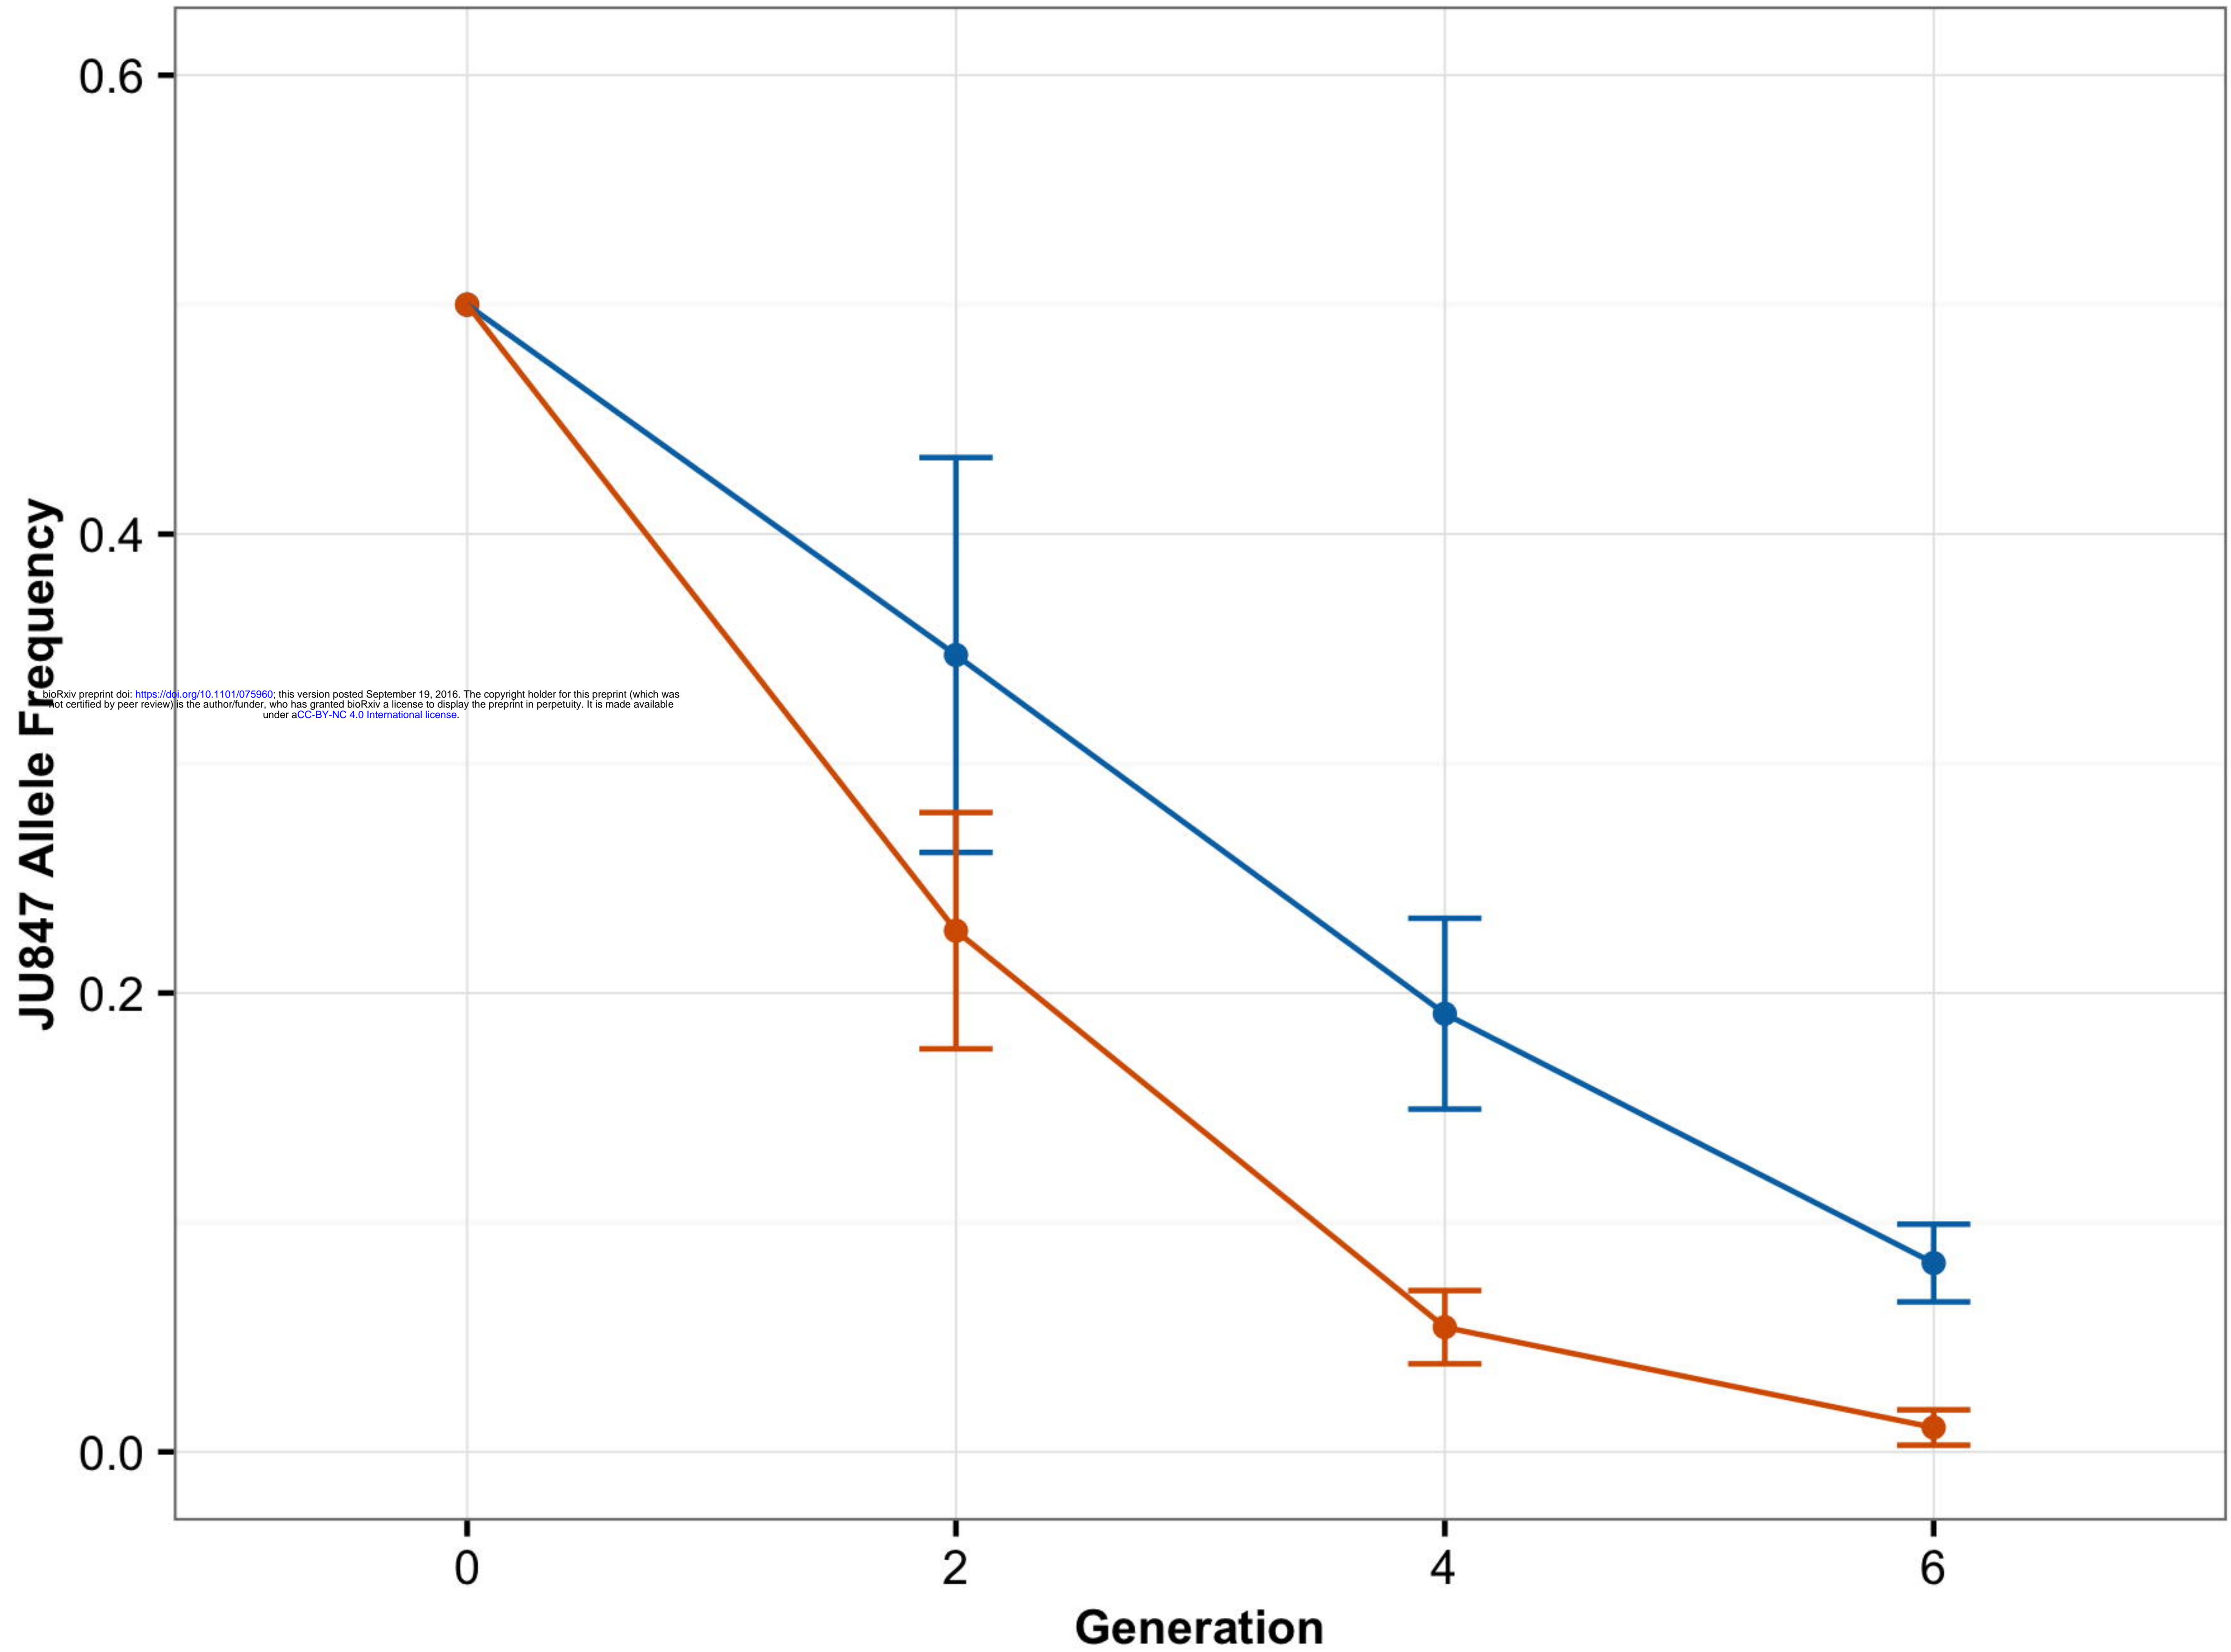

Source: https://www.biorxiv.org/content/10.1101/075960v1.full.pdf
